# Supplementary material for: Biomimetic aerobic oxidative hydroxylation of arylboronic acids to phenols catalysed by a flavin derivative
Source: Royal Society of Chemistry journal article supplement (doi:10.1039/c3ob42081g), 2014-01-01

**Electronic Supplementary Information for**  
**Biomimetic aerobic oxidative hydroxylation of arylboronic**  
**acids to phenols catalysed by a flavin derivative**

Hana Kotoučová, Iveta Strnadová, Martina Kovandová, Josef Chudoba, Hana Dvořáková and  
Radek Cibulka\*

\* cibulka@vscht.cz

**Content:**

|    |                                                                                                 |           |
|----|-------------------------------------------------------------------------------------------------|-----------|
| S1 | Synthesis and characterization of catalyst <b>2</b>                                             | <b>2</b>  |
| S2 | Synthesis and characterization of phenols <b>4</b> and <b>5</b> and alcohols <b>7</b>           | <b>4</b>  |
| S3 | <sup>1</sup> H NMR and <sup>13</sup> C NMR spectra of products <b>4</b> , <b>5</b> and <b>7</b> | <b>7</b>  |
| S4 | Course of oxidative hydroxylation monitored by <sup>1</sup> H and <sup>11</sup> B NMR           | <b>38</b> |

## S1 Synthesis and characterization of catalyst 2

### 5-Ethyl-1,3-dimethylalloxazinium perchlorate (2)

Acetaldehyde (1.55 mL, 27.8 mmol) and palladium on carbon (10%, 88.8 mg) were added to a suspension of 1,3-dimethylalloxazine (223 mg, 0.92 mmol) in acetic acid (15.5 mL) and water (1.55 mL). The resulting mixture was stirred for 56 hours in an autoclave under hydrogen atmosphere (0.6 MPa) at room temperature. The catalyst was removed by filtration, the solvents were evaporated under reduced pressure, and the remaining solid was dried in vacuo. The residue was suspended in perchloric acid (2M, 10.0 mL) and cooled to 0 °C. Then, sodium nitrite (510 mg, 7.39 mmol) was added and the mixture was stirred at room temperature. After 1.5 hour sodium perchlorate (1.332 g, 10.88 mmol) was added and stirred for 30 minutes. The precipitated solid was collected by filtration, washed with 2M perchloric acid and dried in vacuo to give **2** as dark orange powder (160 mg, 64 %). M.p. 226-229 °C.

$^1\text{H}$  NMR (500 MHz, Acetonitrile- $d_3$ )  $\delta$  1.83 (t,  $J = 7.2$  Hz, 3H,  $\text{N}^+\text{CH}_2\text{CH}_3$ ), 3.56 (s, 3H, 3-NCH<sub>3</sub>), 3.87 (s, 3H, 1-NCH<sub>3</sub>), 8.41 – 8.26 (m, 3H, ArH), 8.59 (d,  $J = 8.9$  Hz, 1H, 6-ArH) ppm.  $^{13}\text{C}$  NMR (126 MHz,  $\text{CD}_3\text{CN}$ )  $\delta$  14.6 ( $\text{N}^+\text{CH}_2\text{CH}_3$ ), 29.8 (3-NCH<sub>3</sub>), 30.6 (1-NCH<sub>3</sub>), 51.9 ( $\text{N}^+\text{CH}_2\text{CH}_3$ ), 119.8 (CH), 130.2 (CH), 136.2 (CH), 136.9 (CH), 147.1 ( $\text{C}_{\text{ar}}$ ), 147.7 ( $\text{C}_{\text{Ar}}$ ), 148.8 (2-CO), 155.38 (4-CO) ppm.  $\text{C}_{14}\text{H}_{15}\text{ClN}_4\text{O}_6 \cdot \text{H}_2\text{O}$  (388.77): calcd. C 43.25, H 4.41, N 14.41, Cl 9.12; found C 43.52, H 4.19, N 14.34, Cl 9.27. HRMS (ESI): calcd. for  $\text{C}_{14}\text{H}_{15}\text{N}_4\text{O}_2$   $[\text{M}]^+$  271.11895; found 271.11880.

### $^1\text{H}$ NMR of catalyst 2

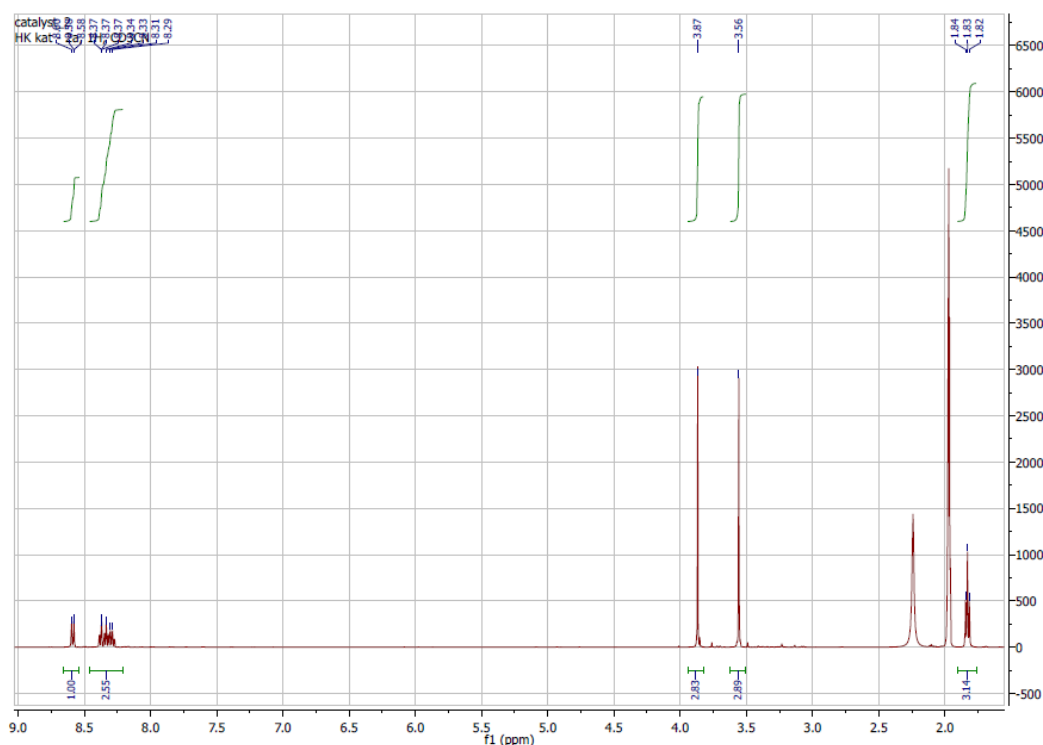

# $^{13}\text{C}$ NMR of catalyst 2

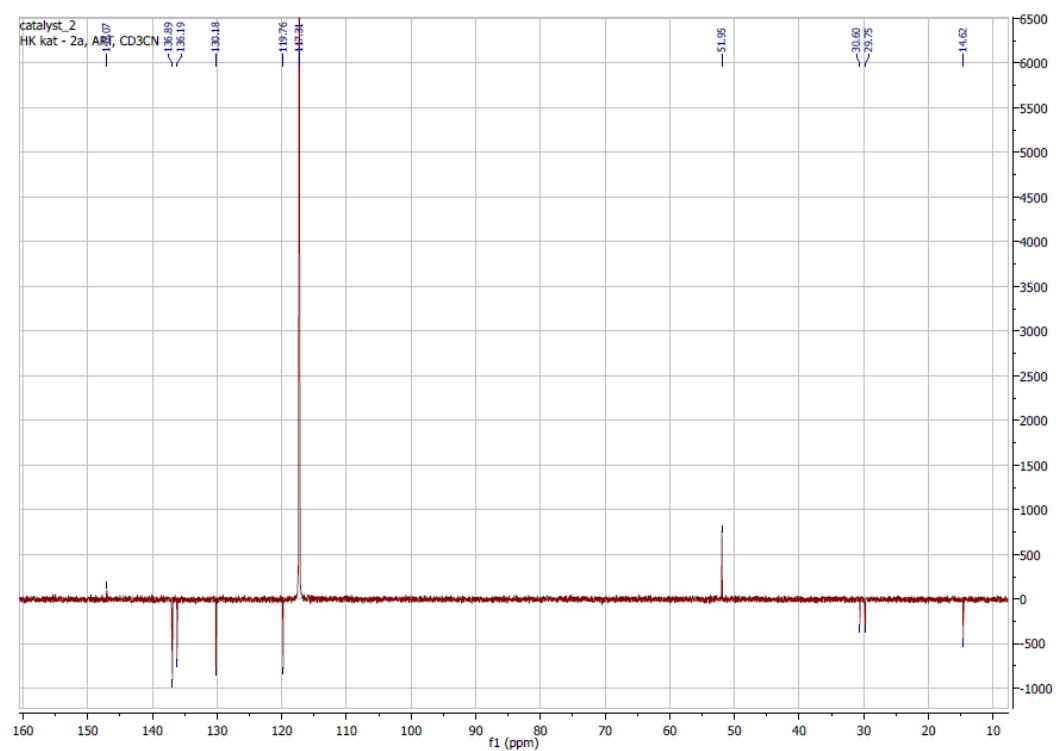

## S2 Synthesis and characterization of phenols 4 and 5 and alcohols 7

**Phenol (4a)** was prepared according to general procedure B (see main text), reaction time 1h, mobile phase hexane – ethyl acetate (5 : 1), yield (70 mg, 94 %).

$^1\text{H}$  NMR (300 MHz, Methanol- $d_4$ )  $\delta$  6.85 – 6.68 (m, 3H), 7.23 – 7.08 (m, 2H) ppm.

$^{13}\text{C}$  NMR (126 MHz, Acetonitrile- $d_3$ )  $\delta$  116.12, 120.76, 130.52, 157.83 ppm.

HRMS (ESI): calcd. for  $\text{C}_6\text{H}_6\text{O}$   $[\text{M} - \text{H}]^-$  93.03459; found 93.03429.

**2-Naphtol (4b)** was prepared according to general procedure B (see main text), reaction time 1h, mobile phase hexane – ethyl acetate (5 : 1), yield (112 mg, 99 %).

$^1\text{H}$  NMR (300 MHz, Methanol- $d_4$ )  $\delta$  7.13 – 6.99 (m, 2H), 7.23 (ddd,  $J = 8.1, 6.8, 1.3$  Hz, 1H), 7.40 – 7.29 (m, 1H), 7.65 – 7.58 (m, 1H), 7.77 – 7.65 (m, 2H) ppm.

$^{13}\text{C}$  NMR (126 MHz, Acetonitrile- $d_3$ )  $\delta$  109.85, 119.06, 124.10, 127.10, 127.31, 128.55, 129.47, 130.47, 130.48, 135.83 ppm.

HRMS (ESI): calcd. for  $\text{C}_{10}\text{H}_8\text{O}$   $[\text{M} - \text{H}]^-$  143.05024; found 143.05046.

**2,6-Dimethylphenol (4c)** was prepared according to general procedure B (see main text), reaction time 4h, mobile phase hexane – ethylacetate (5 : 1), yield (80 mg, 82 %).

$^1\text{H}$  NMR (300 MHz, Methanol- $d_4$ )  $\delta$  2.18 (d,  $J = 0.6$  Hz, 3H), 2.33 (d,  $J = 0.6$  Hz, 3H), 6.63 (t,  $J = 7.5$  Hz, 1H), 6.97 – 6.80 (m, 2H) ppm.

$^{13}\text{C}$  NMR (126 MHz, Acetonitrile- $d_3$ )  $\delta$  16.54, 22.33, 120.73, 124.67, 126.80, 128.96, 129.36, 139.97 ppm.

HRMS (ESI): calcd. for  $\text{C}_8\text{H}_{10}\text{O}$   $[\text{M} - \text{H}]^-$  121.06589; found 121.06586.

**4-Methylphenol (4d)** was prepared according to general procedure B (see main text), reaction time 1h, mobile phase hexane – ethyl acetate (5 : 1), yield (79 mg, 93 %).

$^1\text{H}$  NMR (300 MHz, Methanol- $d_4$ )  $\delta$  2.21 (s, 3H), 6.65 (d,  $J = 8.5$  Hz, 2H), 7.07 – 6.86 (m, 2H) ppm.

$^{13}\text{C}$  NMR (126 MHz, Acetonitrile- $d_3$ )  $\delta$ , 20.49, 115.92, 129.79 130.84, 130.87, 155.55 ppm

HRMS (ESI): calcd. for  $\text{C}_7\text{H}_8\text{O}$   $[\text{M} - \text{H}]^-$  107.05024; found 107.05008.

**3-Methylphenol (4e)** was prepared according to general procedure B (see main text), reaction time 1h, mobile phase hexane – ethyl acetate (5 : 1), yield (80 mg, 94 %).

$^1\text{H}$  NMR (300 MHz, Methanol- $d_4$ )  $\delta$  2.24 (s, 3H), 6.76 – 6.43 (m, 3H), 7.16 – 6.90 (m, 1H) ppm.

$^{13}\text{C}$  NMR (126 MHz, Acetonitrile- $d_3$ )  $\delta$  21.42, 113.14, 116.77, 121.54, 130.29, 140.58, 157.81 ppm.

HRMS (ESI): calcd. for  $\text{C}_7\text{H}_8\text{O}$   $[\text{M} - \text{H}]^-$  107.05024; found 107.05003.

**2-Methylphenol (4f)** was prepared according to general procedure B (see main text), reaction time 2h, mobile phase hexane – ethyl-acetate (5 : 1), yield (71 mg, 84 %).

$^1\text{H}$  NMR (300 MHz, Methanol- $d_4$ )  $\delta$  2.16 (s, 3H), 6.79 – 6.62 (m, 2H), 7.11 – 6.88 (m, 2H) ppm.

$^{13}\text{C}$  NMR (126 MHz, Acetonitrile- $d_3$ )  $\delta$  16.15, 115.59, 115.60, 120.80, 125.17, 127.77, 127.80, 131.79, 155.83 ppm.

HRMS (ESI): calcd. for  $\text{C}_7\text{H}_8\text{O}$   $[\text{M} - \text{H}]^-$  107.05024; found 107.05006.

**4-Nitrophenol (4g)** was prepared according to general procedure B (see main text), reaction time 4h, mobile phase hexane – ethylacetate (3 : 1), yield (63 mg, 57 %) or according to general procedure D (see main text), reaction time 2h, mobile phase hexane – acetate (3 : 1), yield (92 mg, 84%)

$^1\text{H}$  NMR (300 MHz, Methanol- $d_4$ )  $\delta$  6.93 – 6.83 (m, 2H), 8.17 – 8.06 (m, 2H) ppm.

$^{13}\text{C}$  NMR (126 MHz, Acetonitrile- $d_3$ )  $\delta$  116.50, 127.01, 163.82 ppm.

HRMS (ESI): calcd.  $\text{C}_6\text{H}_5\text{NO}_3$   $[\text{M} - \text{H}]^-$  138.01967; found 138.01971.

**3-Nitrophenol (4h)** was prepared according to general procedure B (see main text), reaction time 4h, mobile phase hexane – ethyl acetate (5 : 1), yield (101 mg, 92 %).

$^1\text{H}$  NMR (300 MHz, Methanol- $d_4$ )  $\delta$  7.15 (ddd,  $J$  = 8.2, 2.5, 0.9 Hz, 1H), 7.39 (td,  $J$  = 8.2, 0.3 Hz, 1H), 7.62 – 7.55 (m, 1H), 7.67 (ddd,  $J$  = 8.2, 2.2, 0.9 Hz, 1H) ppm.

$^{13}\text{C}$  NMR (126 MHz, Acetonitrile- $d_3$ )  $\delta$  110.89, , 115.67, 122.89, 131.33, 150.20, 158.54 ppm.

HRMS (ESI): calcd.  $\text{C}_6\text{H}_5\text{NO}_3$   $[\text{M} - \text{H}]^-$  138.01967; found 138.01973.

**2-Nitrophenol (4i)** was prepared according to general procedure B (see main text), reaction time 4h, mobile phase hexane – ethyl acetate (2 : 1), yield (25 mg, 23 %) or according to general procedure C (see main text), reaction time 4h, mobile phase hexane – ethyl acetate (2 : 1), yield (55 mg, 49 %) or according to general procedure D (see S3), reaction time 2h, mobile phase hexane – acetate (2 : 1), yield (64 mg, 56%).

$^1\text{H}$  NMR (300 MHz, Methanol- $d_4$ )  $\delta$  7.01 (ddd,  $J$  = 8.5, 7.2, 1.3 Hz, 1H), 7.17 – 7.08 (m, 1H), 7.59 (ddd,  $J$  = 8.4, 7.2, 1.7 Hz, 1H) 8.10 – 8.02 (m, 1H) ppm.

$^{13}\text{C}$  NMR (126 MHz, Acetonitrile- $d_3$ )  $\delta$  120.61., 121.25, 125.94, 138.58, 155.56 ppm.

HRMS (ESI): calcd.  $\text{C}_6\text{H}_5\text{NO}_3$   $[\text{M} - \text{H}]^-$  138.01967; found 138.01988.

**4-Chlorophenol (4j)** was prepared according to general procedure B (see main text), reaction time 1h, mobile phase hexane – ethyl acetate (5 : 1), yield (96 mg, 95 %).

$^1\text{H}$  NMR (300 MHz, Methanol- $d_4$ )  $\delta$  6.79 – 6.66 (m, 2H), 7.18 – 7.06 (m, 2H) ppm.

$^{13}\text{C}$  NMR (126 MHz, Acetonitrile- $d_3$ )  $\delta$  117.72, 124.91, 130.23, 156.75, 171.78 ppm.

HRMS (ESI): calcd.  $\text{C}_6\text{H}_5\text{ClO}$   $[\text{M} - \text{H}]^-$  126.99562; found 126.99575.

**3-Chlorophenol (4k)** was prepared according to general procedure B (see main text), reaction time 2h, mobile phase hexane – ethyl-acetate (5 : 1), yield (85 mg, 84 %).

$^1\text{H}$  NMR (300 MHz, Methanol- $d_4$ )  $\delta$  6.68 (ddd,  $J$  = 8.2, 2.1, 1.2 Hz, 1H), 6.83 – 6.74 (m, 2H), 7.18 – 7.07 (m, 1H) ppm.

$^{13}\text{C}$  NMR (126 MHz, Acetonitrile- $d_3$ )  $\delta$  114.91, 116.40, 120.76, 131.65, 135.18, 158.84 ppm.

HRMS (ESI): calcd.  $\text{C}_6\text{H}_5\text{ClO}$   $[\text{M} - \text{H}]^-$  126.99562; found 126.99564.

**2-Chlorophenol (4l)** was prepared according to general procedure B (see main text), reaction time 1h, mobile phase hexane – ethyl acetate (5 : 1), yield (102 mg, 98 %).

$^1\text{H}$  NMR (300 MHz, Methanol- $d_4$ )  $\delta$  6.78 (ddd,  $J$  = 7.9, 7.3, 1.5 Hz, 1H), 6.93 – 6.85 (m, 1H), 7.10 (ddd,  $J$  = 8.2, 7.4, 1.6 Hz, 1H), 7.26 (dd,  $J$  = 8.0, 1.6 Hz, 1H) ppm.

$^{13}\text{C}$  NMR (126 MHz, Acetonitrile- $d_3$ )  $\delta$  117.58, 120.95, 121.93, 129.07, 130.66, 153.20 ppm.

HRMS (ESI): calcd.  $\text{C}_6\text{H}_5\text{ClO}$   $[\text{M} - \text{H}]^-$  126.99562; found 126.99562.

**4-Vinylphenol (4m)** was prepared according to general procedure C (see main text), reaction time 2h, mobile phase hexane – ethyl acetate (2 : 1), yield (72 mg, 76 %).

$^1\text{H}$  NMR (300 MHz, Methanol- $d_4$ )  $\delta$  5.02 (d,  $J$  = 10.9 Hz, 1H), 5.68 – 5.45 (m, 1H), 6.62 (dd,  $J$  = 17.6, 10.9 Hz, 1H), 6.73 (d,  $J$  = 8.6 Hz, 2H), 7.48 – 7.06 (m, 2H) ppm.

$^{13}\text{C}$  NMR (126 MHz, Methanol- $d_4$ )  $\delta$  16.55, 28.97, 116.05, 156.14, 129.62, 136.39 ppm

HRMS (ESI): calcd.  $\text{C}_8\text{H}_8\text{O}$   $[\text{M} - \text{H}]^-$  119.05024; found 119.05036.

**3-Hydroxypyridine (4n)** was prepared according to general procedure B (see main text), reaction time 2h, mobile phase ethyl acetate, yield (52 mg, 69 %).

$^1\text{H}$  NMR (300 MHz, Methanol- $d_4$ )  $\delta$  7.34 – 7.19 (m, 2H), 8.00 (dd,  $J$  = 4.2, 2.0 Hz, 1H), 8.15 – 8.05 (m, 1H) ppm.

$^{13}\text{C}$  NMR (126 MHz, Methanol- $d_4$ )  $\delta$  124.46, 125.85, 138.26, 140.82, 155.94 ppm.

HRMS (ESI): calcd.  $\text{C}_5\text{H}_5\text{NO}$   $[\text{M} - \text{H}]^-$  94.02984; found 94.02971.

**4-(Hydroxymethyl)phenol (4o)** was prepared according to general procedure B (see main text), reaction time 2h, mobile phase hexane – ethyl acetate (1 : 1), yield (73 mg, 74 %).

$^1\text{H}$  NMR (300 MHz, Methanol- $d_4$ )  $\delta$  4.48 (s, 2H), 6.75 (d,  $J$  = 8.5 Hz, 1H), 7.24 – 7.10 (m, 1H) ppm.

$^{13}\text{C}$  NMR (126 MHz, Methanol- $d_4$ )  $\delta$  65.07, 116.05, 129.80, 133.43, 157.81 ppm.

HRMS (ESI): calcd.  $\text{C}_7\text{H}_8\text{O}_2$   $[\text{M} - \text{H}]^-$  123.04515; found 123.04531

**4-Hydroxybenzaldehyde (4p)** was prepared according to general procedure C (see S3), mobile phase hexane – ethyl acetate (2 : 1), yield (75 mg, 77 %).

$^1\text{H}$  NMR (300 MHz, Methanol- $d_4$ )  $\delta$  6.68 (ddd,  $J$  = 8.2, 2.1, 1.2 Hz, 1H), 6.83 – 6.74 (m, 2H), 7.18 – 7.07 (m, 1H) ppm.

$^{13}\text{C}$  NMR (126 MHz, Acetonitrile- $d_3$ )  $\delta$  116.69, 130.56, 132.95, 163.47, 191.80 ppm.

HRMS (ESI): calcd.  $\text{C}_6\text{H}_5\text{O}_2$ :  $[\text{M} - \text{H}]^-$  121.02950; found 121.02954.

**Bis(4-hydroxybenzylidene)hydrazine (5)** was prepared according to general procedure B (see S3), reaction time 1h, mobile phase hexane – ethyl acetate (1 : 1), yield (91 mg, 96 %).

$^1\text{H}$  NMR (300 MHz, Methanol- $d_4$ )  $\delta$  6.86 (d,  $J$  = 8.6 Hz, 4H), 7.69 (d,  $J$  = 8.7 Hz, 4H), 8.52 (s, 2H) ppm.

$^{13}\text{C}$  NMR (126 MHz, Dimethyl Sulfoxide- $d_6$ )  $\delta$  115.73, 125.10, 130.04, 130.05, 160.25, 160.34 ppm.

HRMS (ESI): calcd. for  $\text{C}_{14}\text{H}_{12}\text{N}_2\text{O}_2$   $[\text{M} - \text{H}]^-$  238.07533; found 239.08360.

**Cyclohexanol (7a)** was prepared according to general procedure B (see S3), reaction time 2h, mobile phase hexane – ethyl acetate (2 : 1), yield (30 mg, 38 %).

$^1\text{H}$  NMR (500 MHz, Acetonitrile- $d_3$ )  $\delta$  1.20 (dd,  $J$  = 19.9, 11.4 Hz, 4H), 1.51 (d,  $J$  = 12.2 Hz, 2H), 1.69 (dd,  $J$  = 9.0, 3.3 Hz, 2H), 1.79 (d,  $J$  = 11.3 Hz, 1H), 2.89 (s, 1H), 3.50 (d,  $J$  = 32.5 Hz, 2H) ppm.

$^{13}\text{C}$  NMR (126 MHz, Acetonitrile- $d_3$ )  $\delta$  25.21, 26.60, 36.44, 70.45, 118.26 ppm.

HRMS (ESI): calcd. for  $\text{C}_6\text{H}_{12}\text{O}$   $[\text{M} + \text{Na}]^+$  123.07858; found 123.07804

**Dodecanol (7b)** was prepared according to general procedure B (see S3), reaction time 2h, mobile phase hexane – ethyl acetate (5 : 1), yield (101 mg, 69%).

$^1\text{H}$  NMR (500 MHz, Acetonitrile- $d_3$ )  $\delta$  0.88 (t,  $J$  = 6.7 Hz, 3H), 1.28 (s, 18H), 1.46 (d,  $J$  = 6.2 Hz, 2H), 2.17 (s, 1H), 2.49 (t,  $J$  = 5.4 Hz, 2H), 3.47 (q,  $J$  = 6.5 Hz, 2H) ppm.

$^{13}\text{C}$  NMR (126 MHz, Acetonitrile- $d_3$ )  $\delta$  14.42, 23.43, 26.68, 30.12, 30.26, 30.40, 30.43, 32.68, 62.64, 118.26 ppm.

HRMS (ESI): calcd. for  $\text{C}_{12}\text{H}_{26}\text{O}$   $[\text{M} + \text{Na}]^+$  209.18813; found 209.18759

### S3 $^1\text{H}$ NMR and $^{13}\text{C}$ NMR spectra of products 4, 5 and 7

#### Phenol (4a)

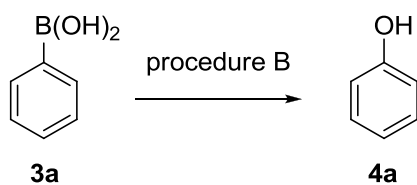

#### Reaction mixture

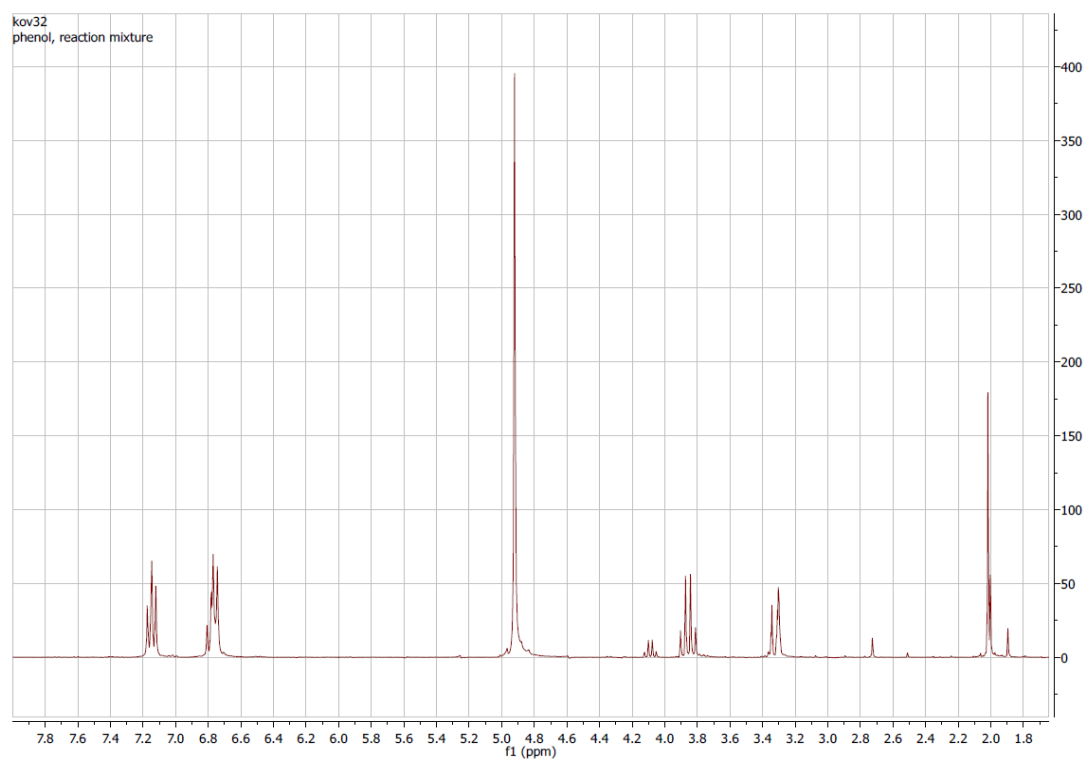

#### Isolated phenol **4a** ( $^1\text{H}$ and $^{13}\text{C}$ NMR)

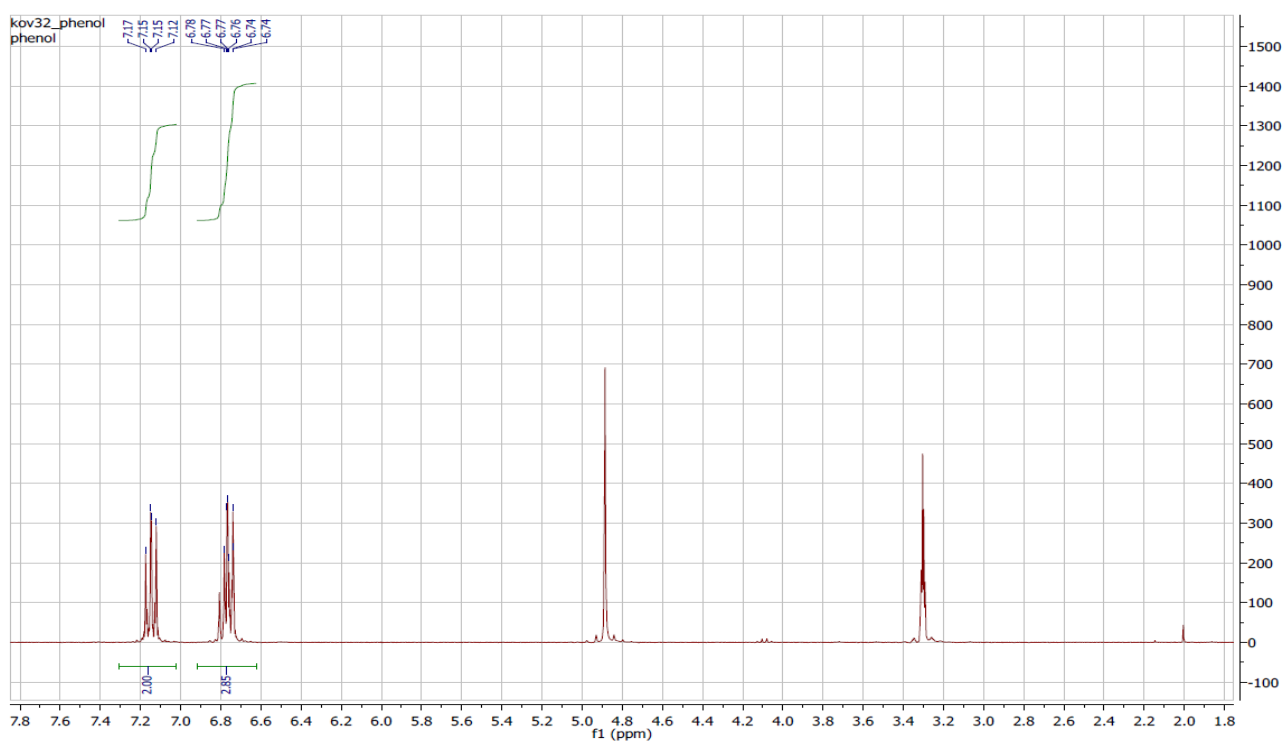





# Isolated naphthol **4b** ( $^1\text{H}$ and $^{13}\text{C}$ NMR)

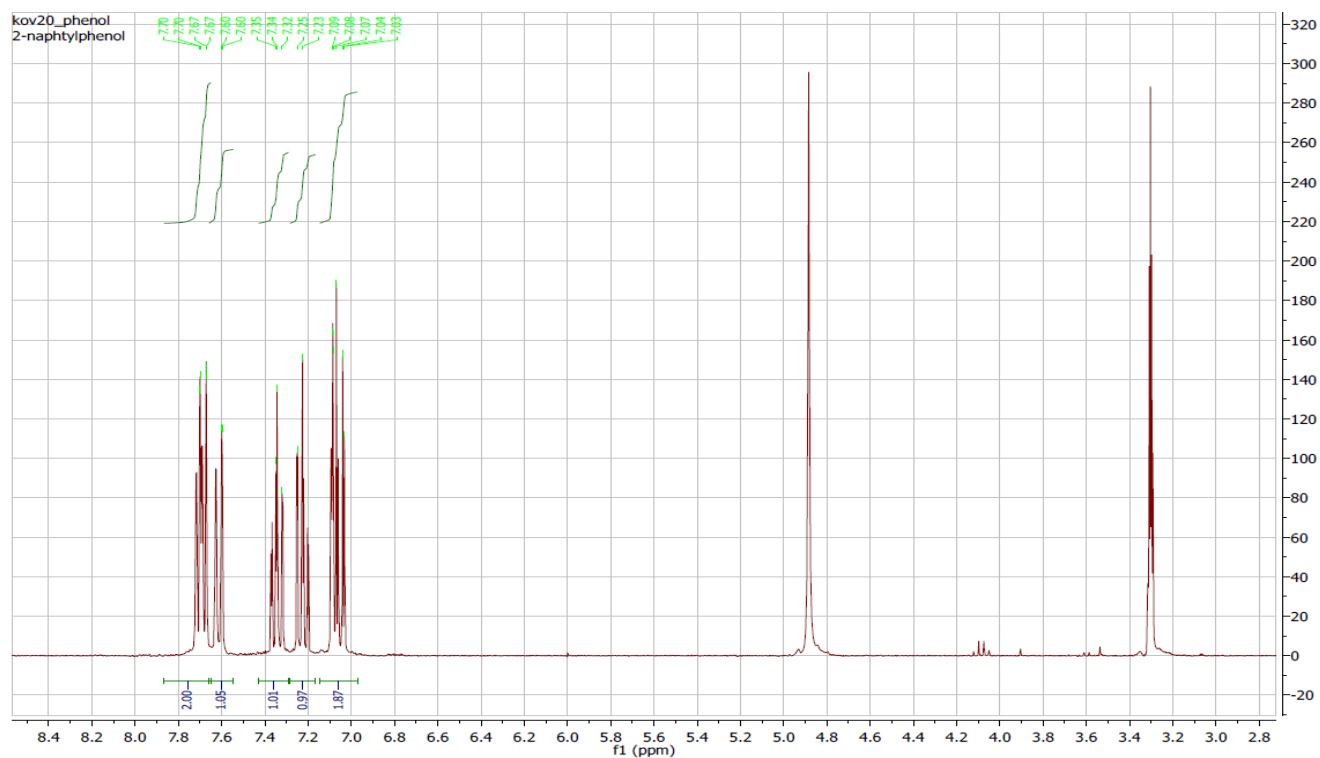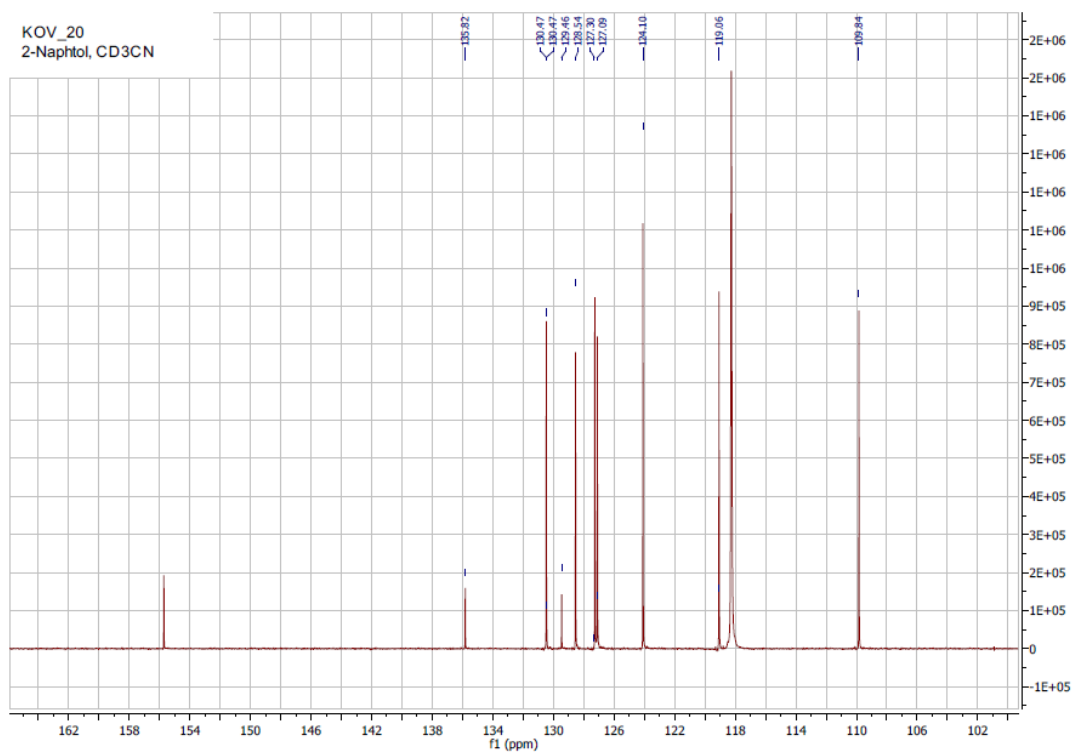

kov31  
2,6-dimethylphenol, reaction mixture

1900  
1800  
1700  
1600  
1500  
1400  
1300  
1200  
1100  
1000  
900  
800  
700  
600  
500  
400  
300  
200  
100  
0  
-100

7.5 7.0 6.5 6.0 5.5 5.0 4.5 4.0 3.5 3.0 2.5 2.0 1.5 1.0

f1 (ppm)

<sup>1</sup>H NMR spectrum of 2,6-dimethylphenol in CDCl<sub>3</sub>. The spectrum shows peaks at 6.8-7.0 ppm (aromatic protons), 4.8 ppm (OH), 3.3 ppm (CH<sub>3</sub>), 2.3 ppm (CH<sub>3</sub>), and 2.1 ppm (CH<sub>3</sub>). Integration values are 1.00, 0.98, 1.01, and 8.01. A list of chemical shifts is provided at the top.

| Chemical Shift (ppm) |
|----------------------|
| 7.034                |
| 7.028                |
| 7.022                |
| 6.972                |
| 6.971                |
| 6.965                |
| 6.950                |
| 6.899                |
| 6.892                |
| 6.889                |
| 6.888                |
| 6.888                |
| 6.887                |
| 6.877                |
| 6.866                |
| 6.851                |
| 6.666                |
| 6.653                |
| 6.61                 |

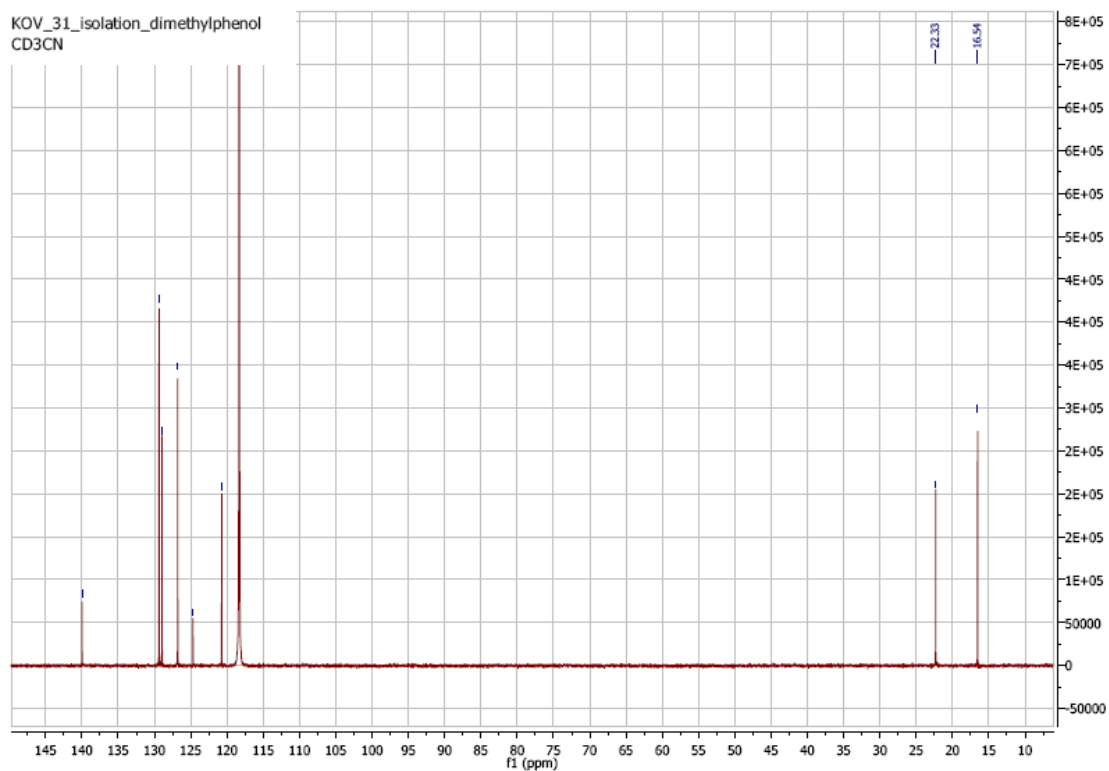

#### 4-Methylphenol (4d)

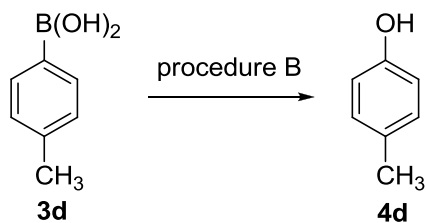

#### Reaction mixture

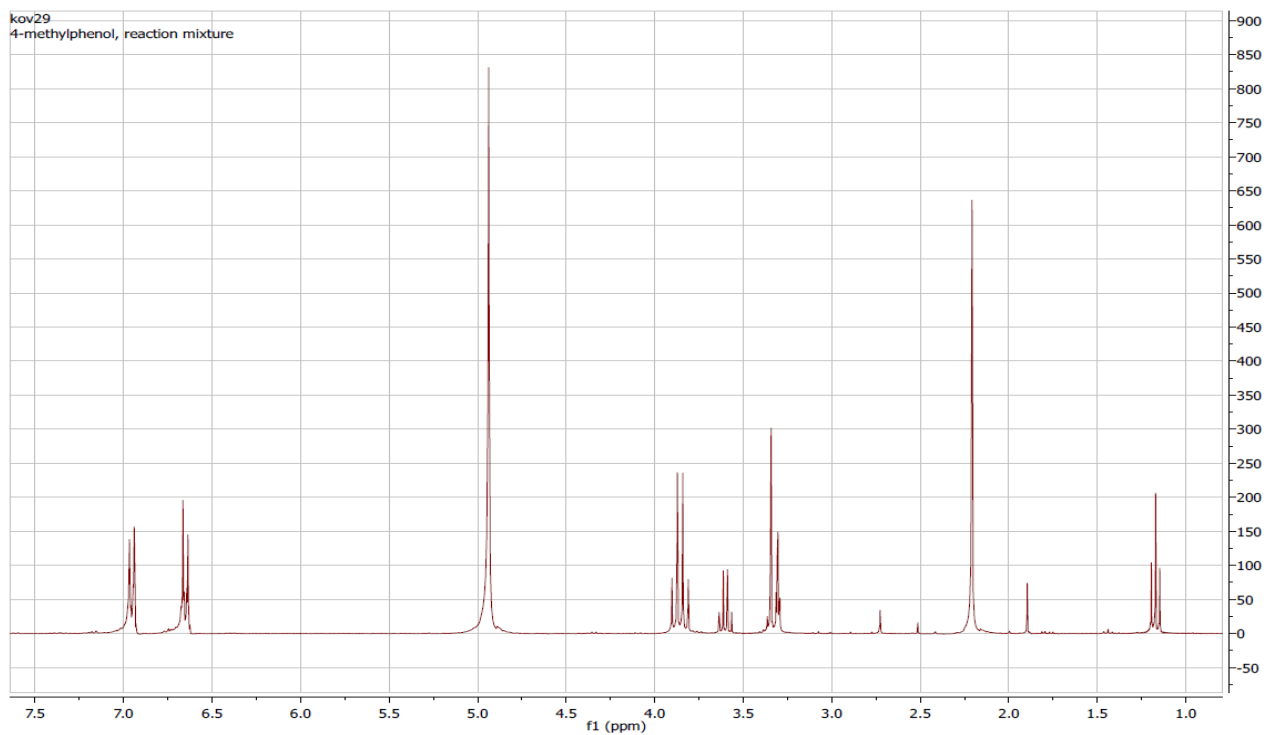

# Isolated phenol **4d** ( $^1\text{H}$ and $^{13}\text{C}$ NMR)

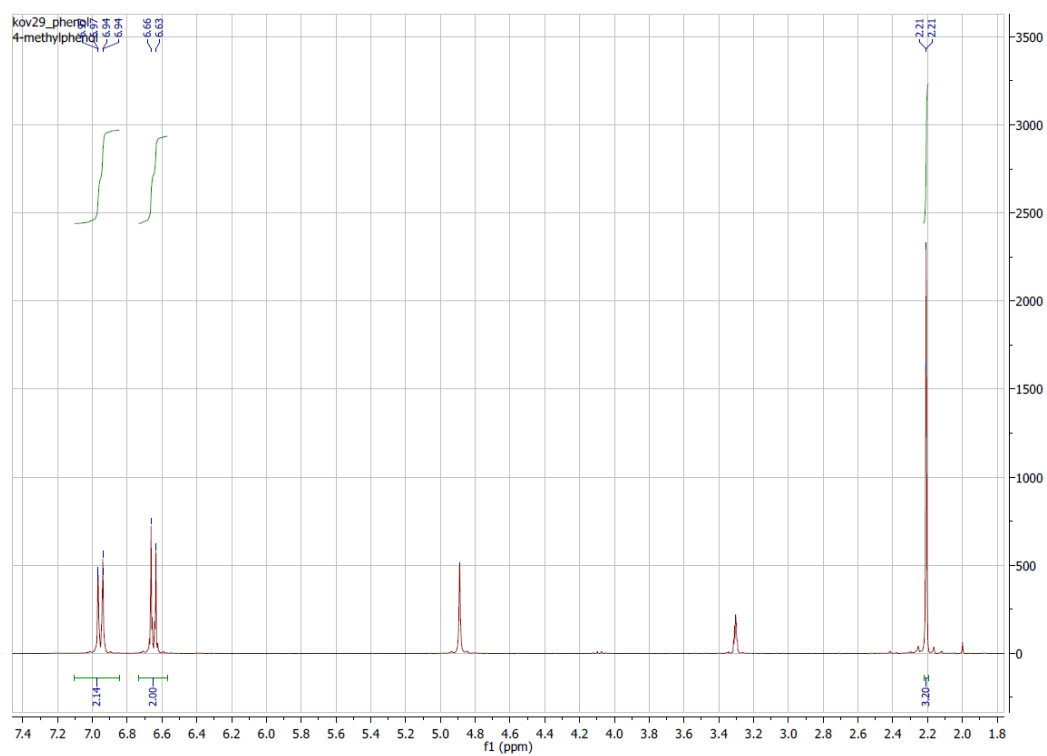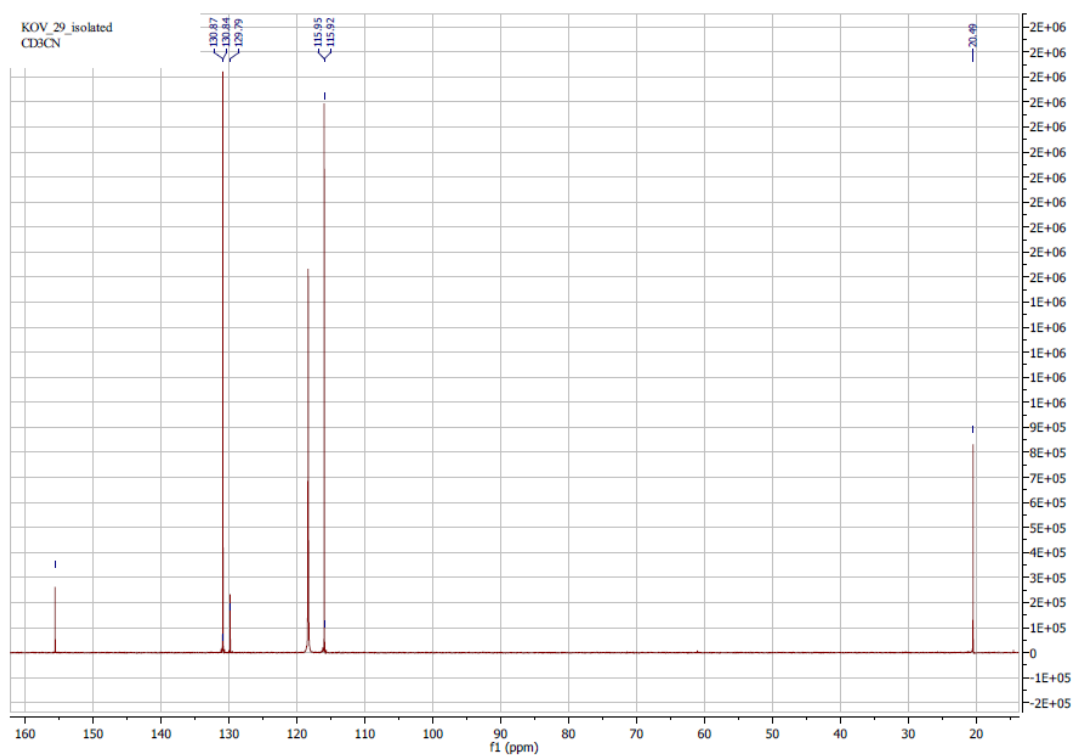

### 3-Methylphenol (4e)

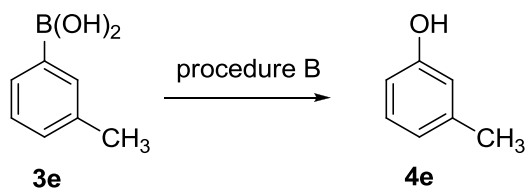

### Reaction mixture

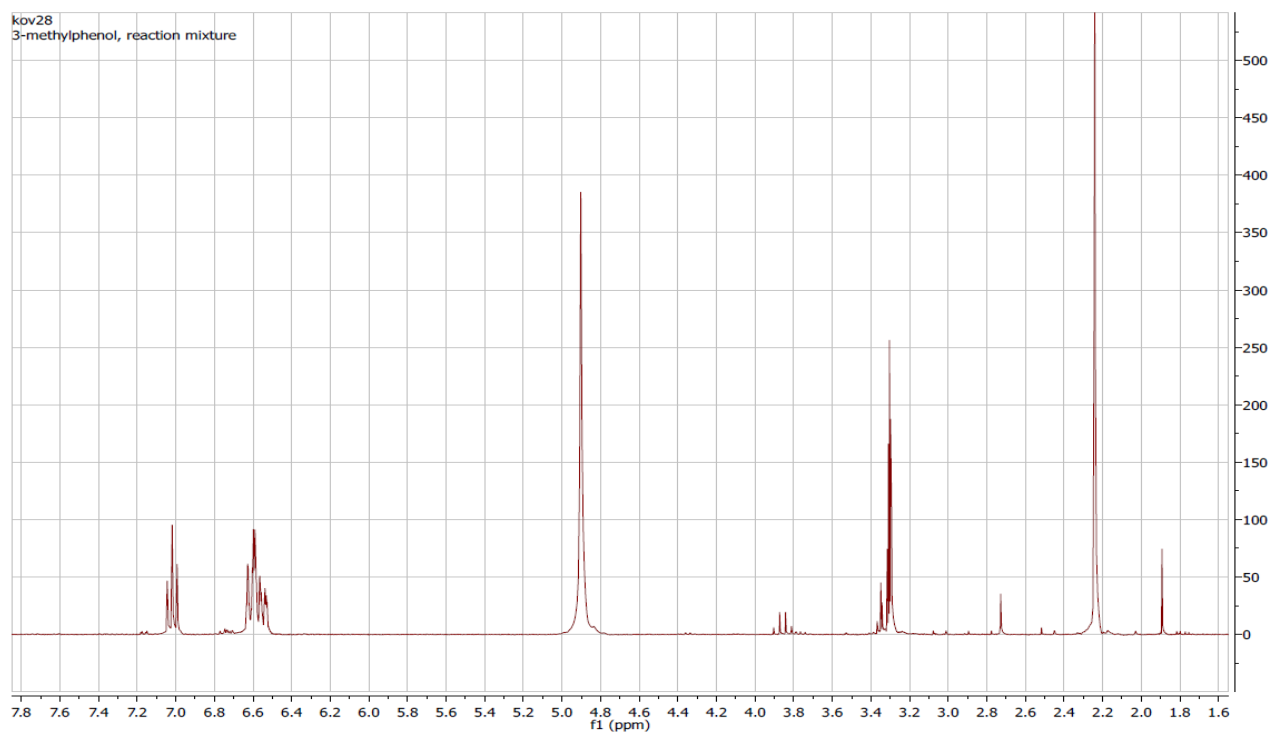

### Isolated phenol **4e** (<sup>1</sup>H and <sup>13</sup>C NMR)

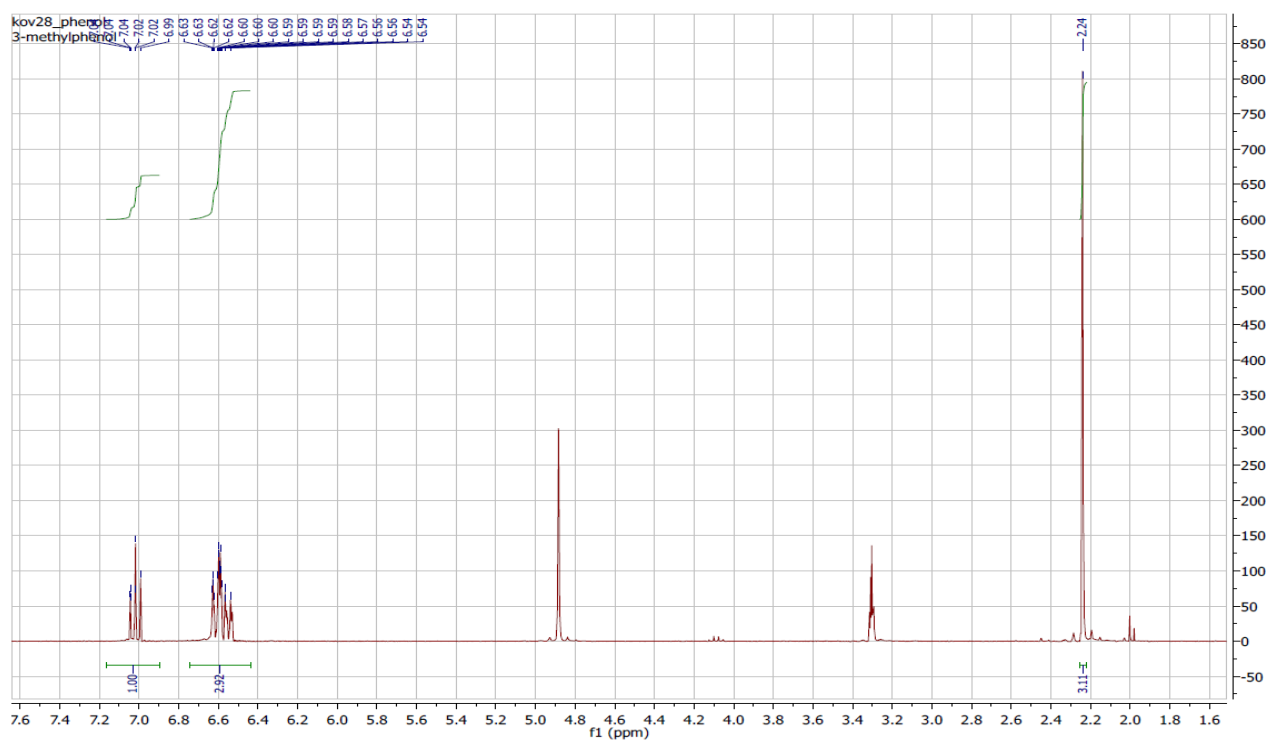

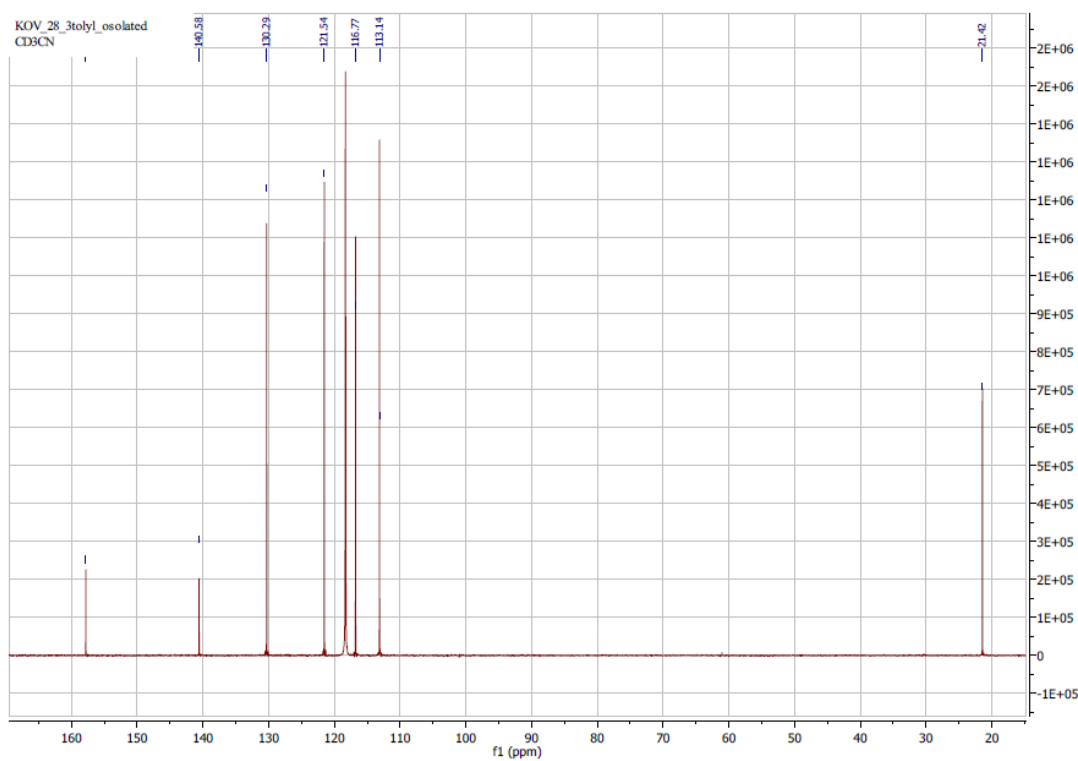

## 2-Methylphenol (4f)

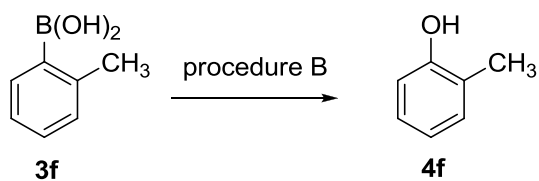

## Reaction mixture

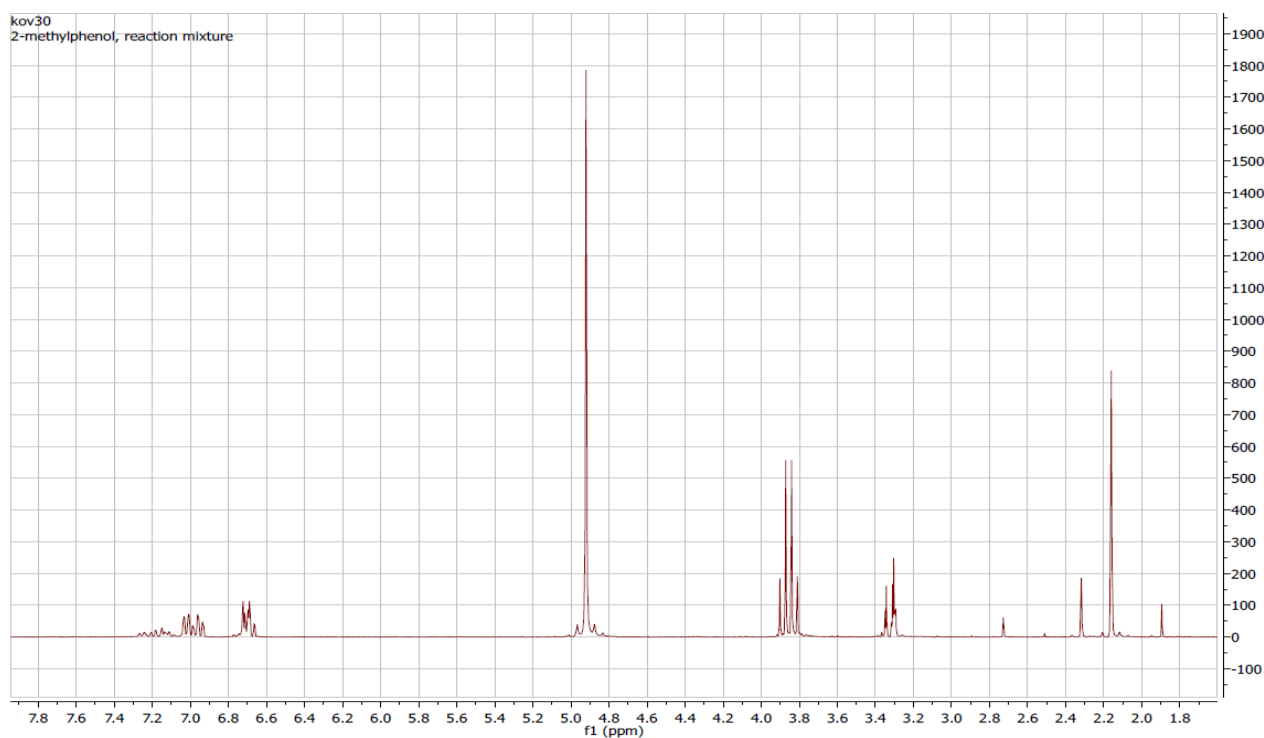

Isolated phenol **4f** (<sup>1</sup>H and <sup>13</sup>C NMR)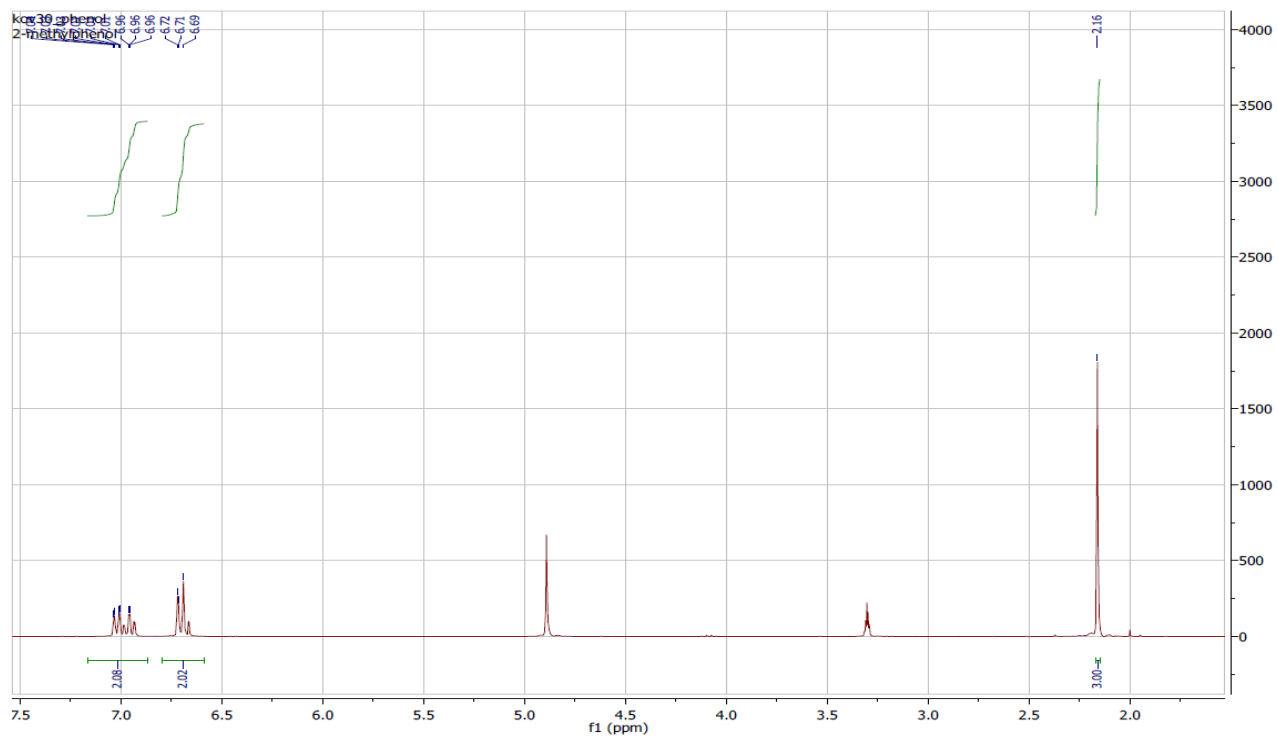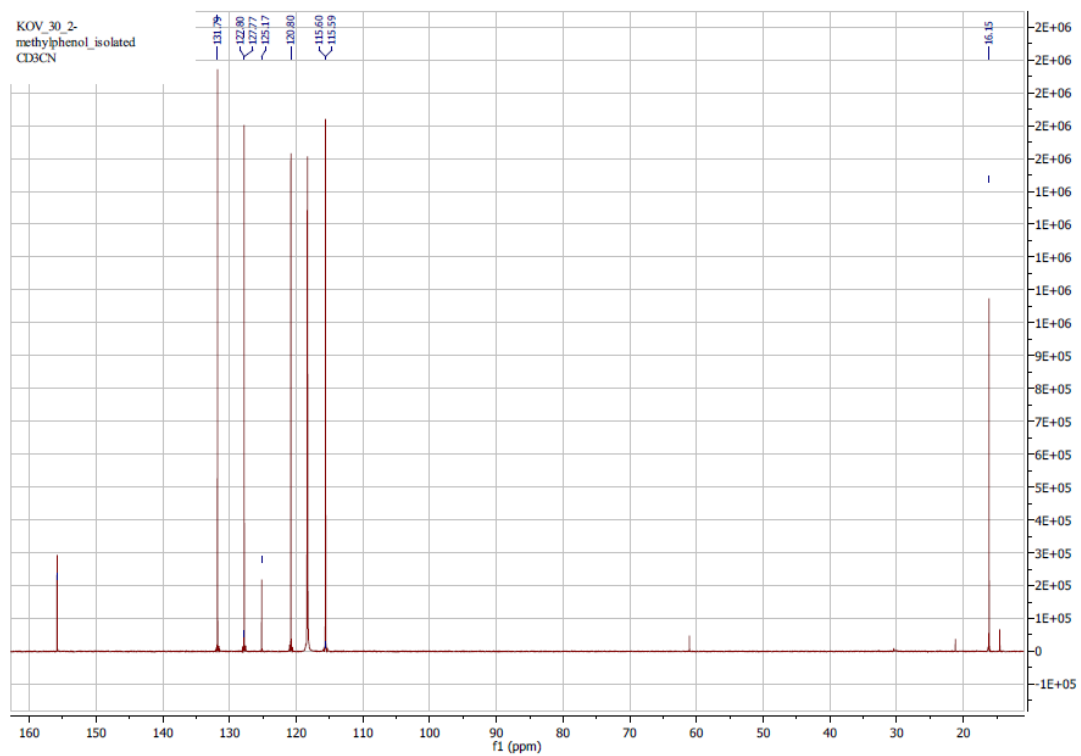

### 4-Nitrophenol (4g)

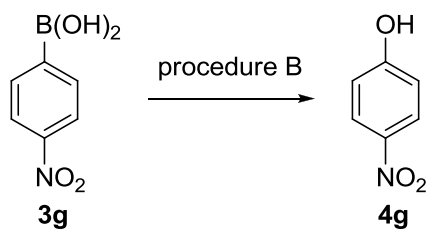

### Reaction mixture – procedure B

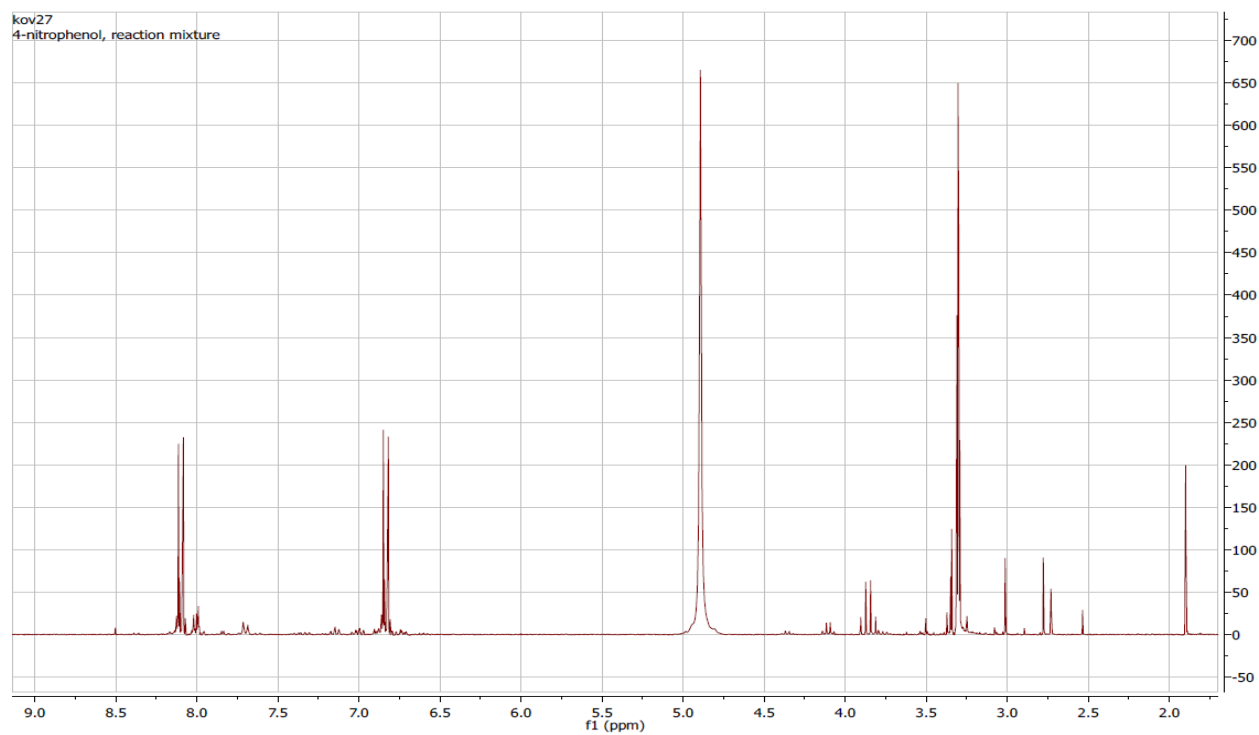

### Isolated phenol **4g** – procedure B

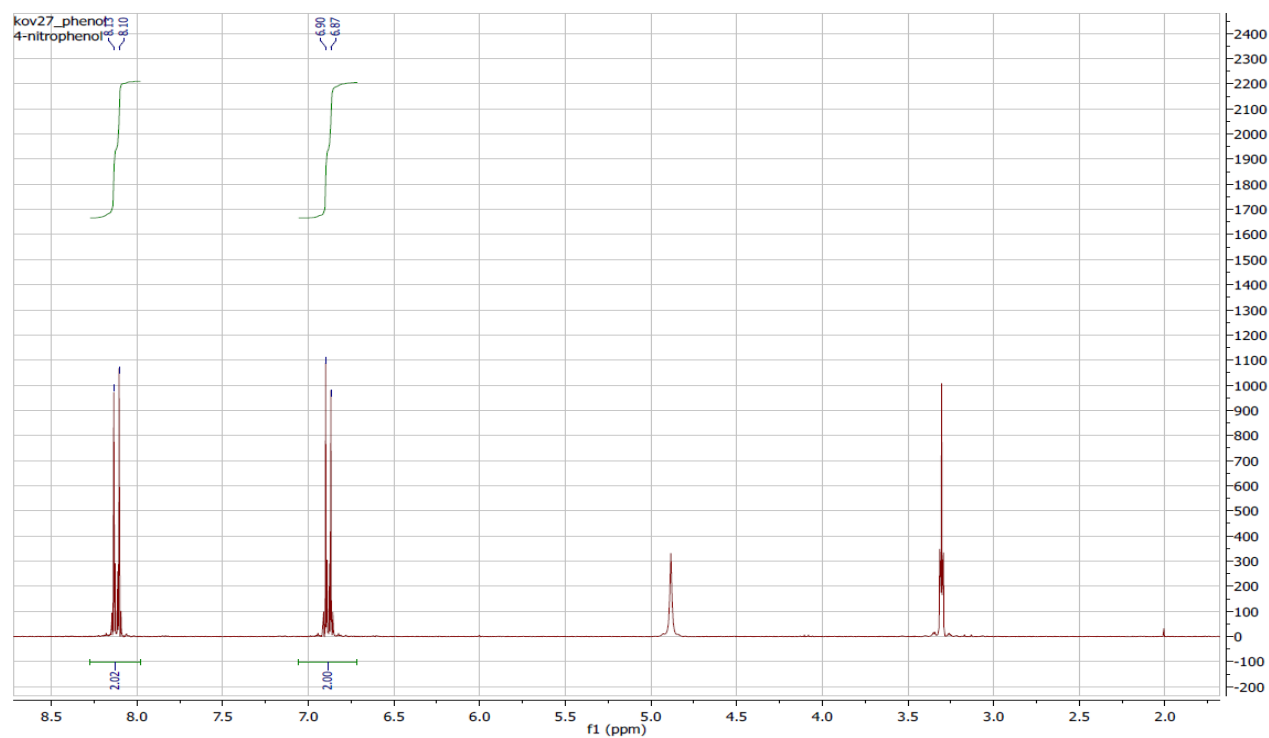



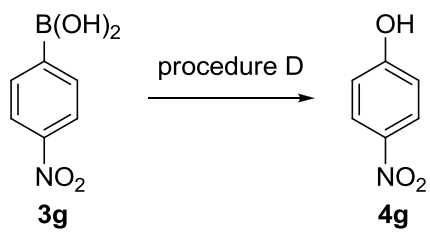

### Reaction mixture – procedure D

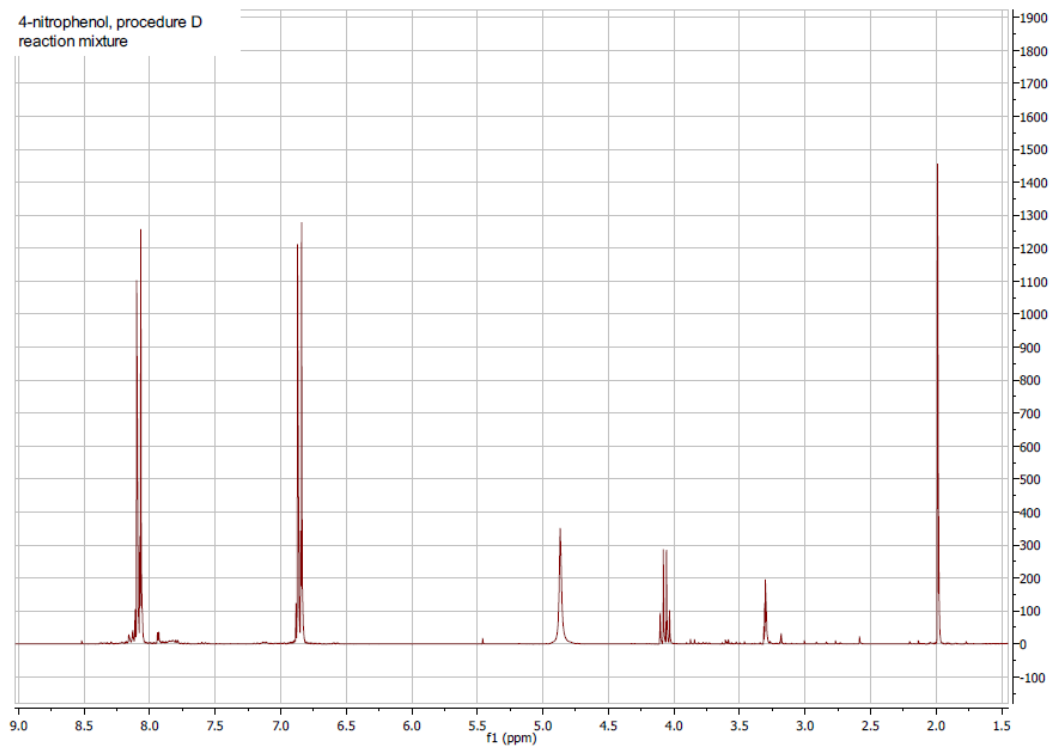

### Isolated phenol **4g** – procedure D ( $^1\text{H}$ and $^{13}\text{C}$ NMR)

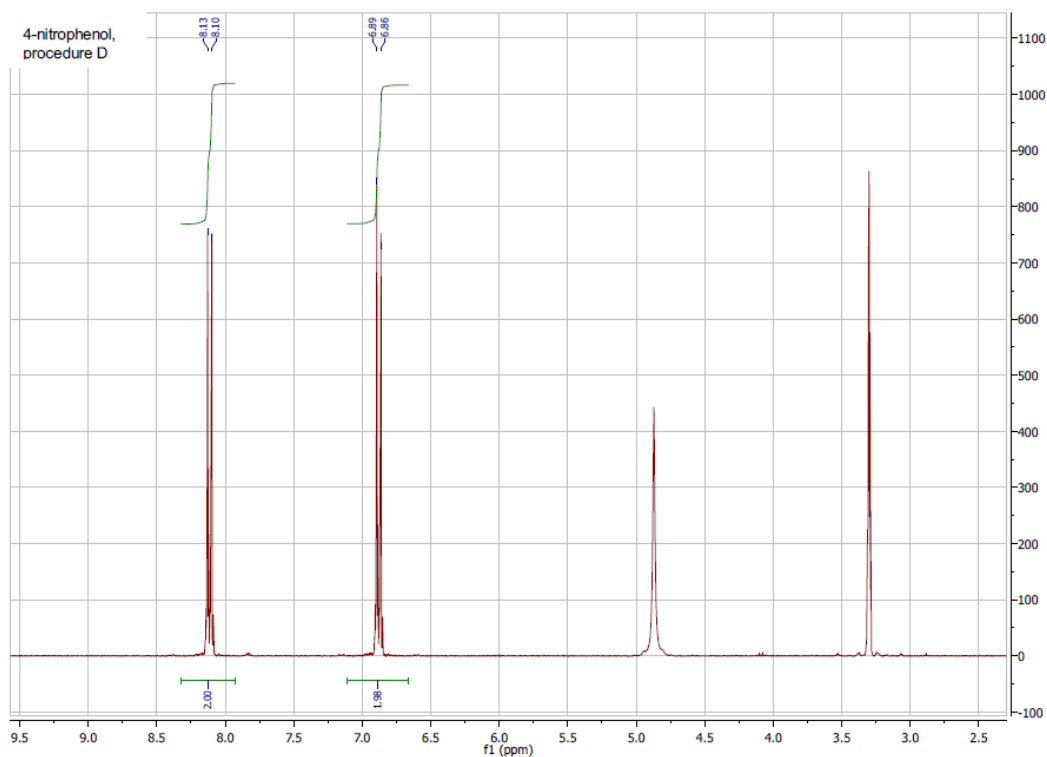

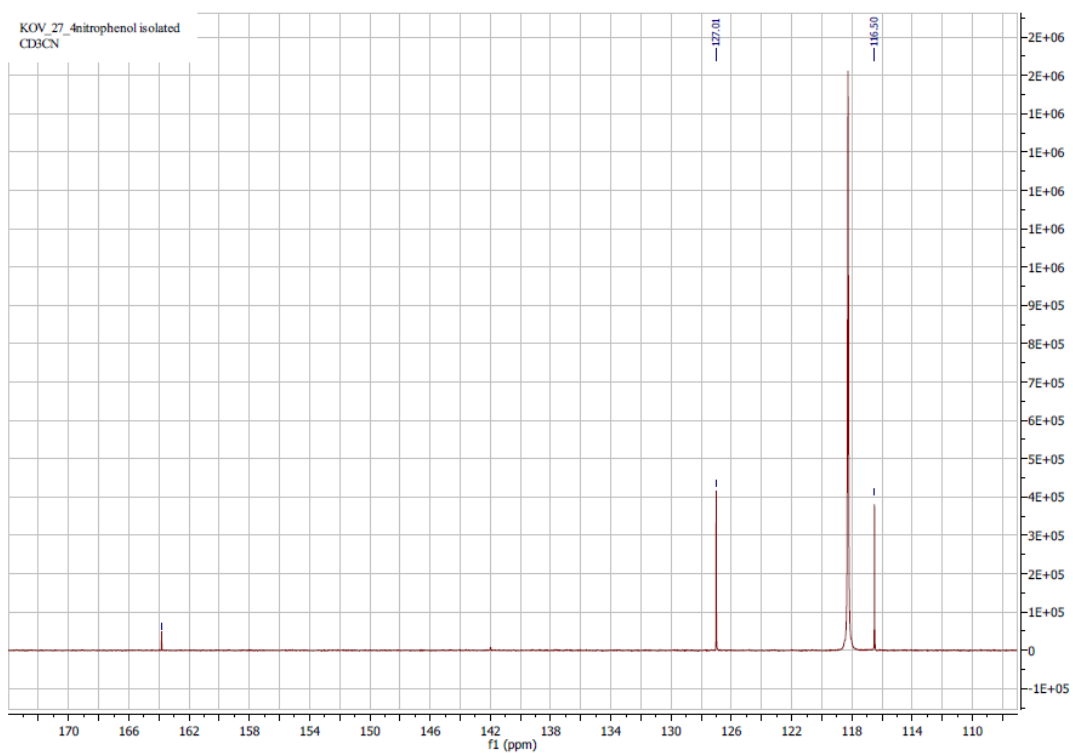

### 3-Nitrophenol (4h)

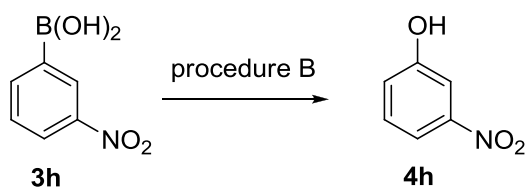

### Reaction mixture

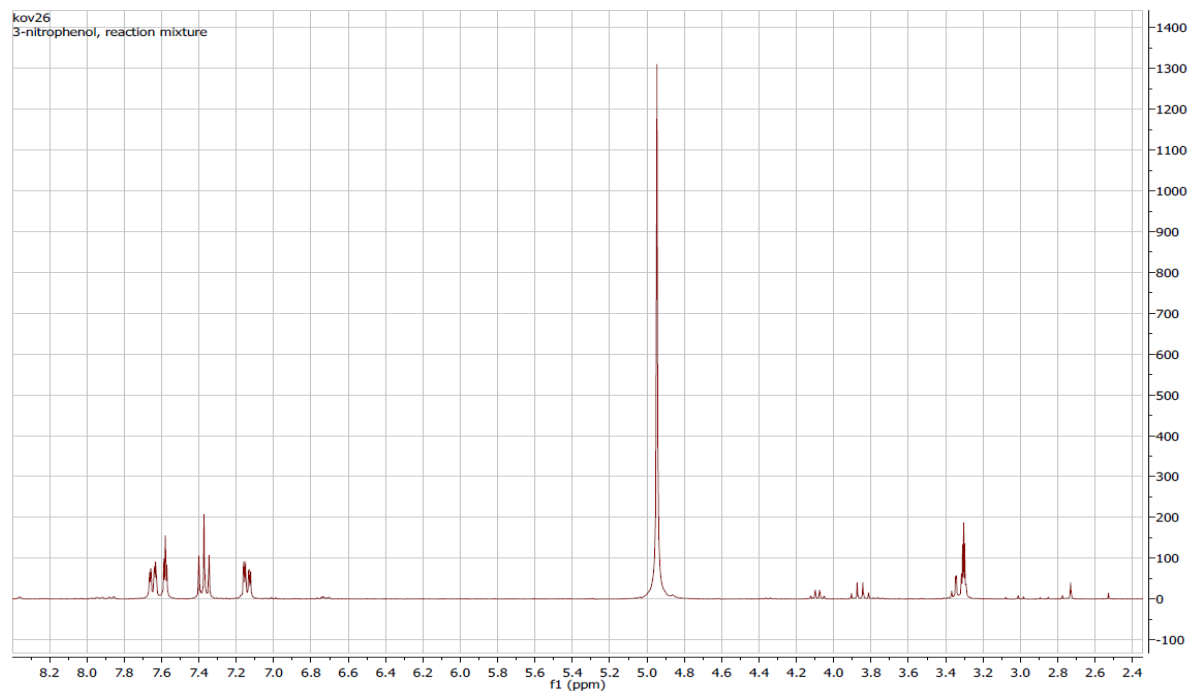

# Isolated phenol **4h** ( $^1\text{H}$ and $^{13}\text{C}$ NMR)

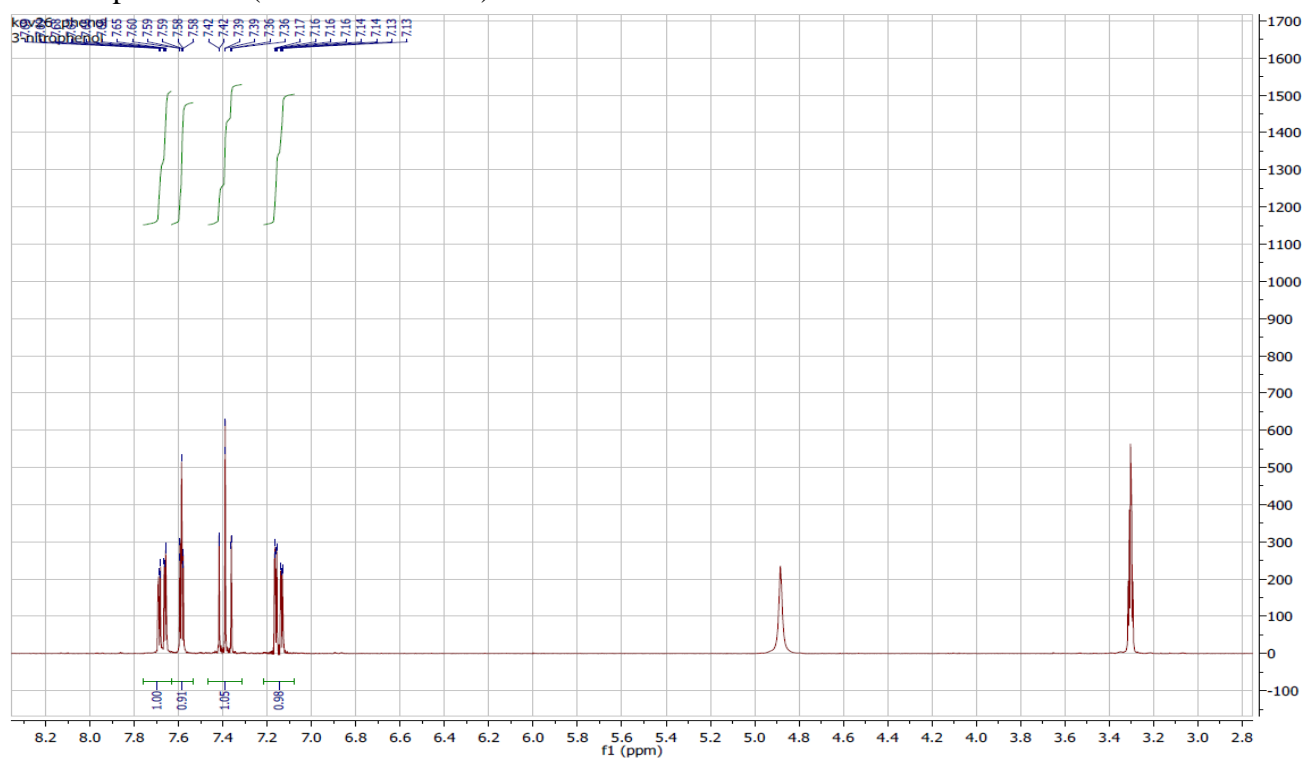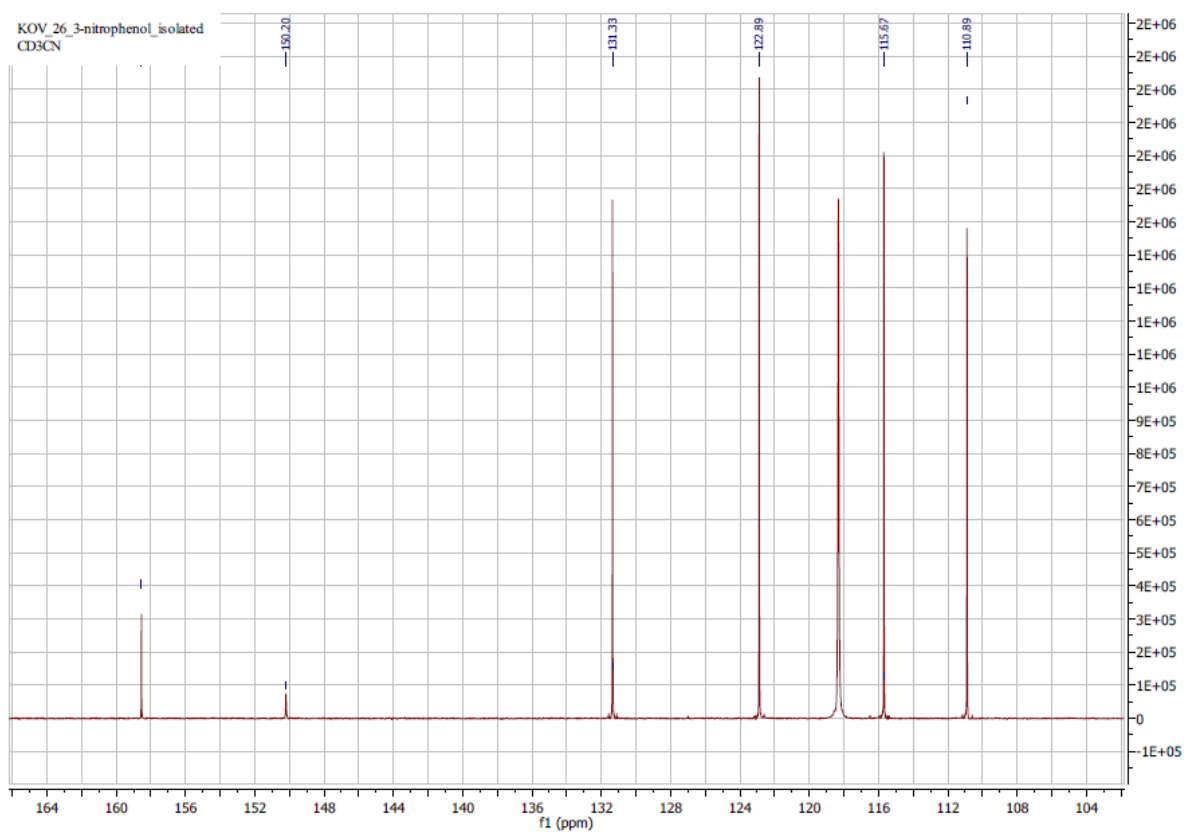

## 2-Nitrophenol (4i)

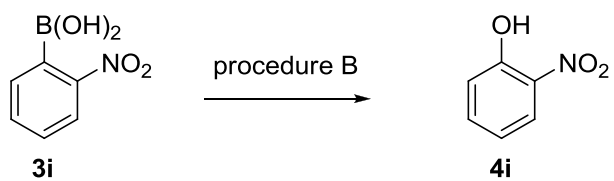

### Reaction mixture – procedure B

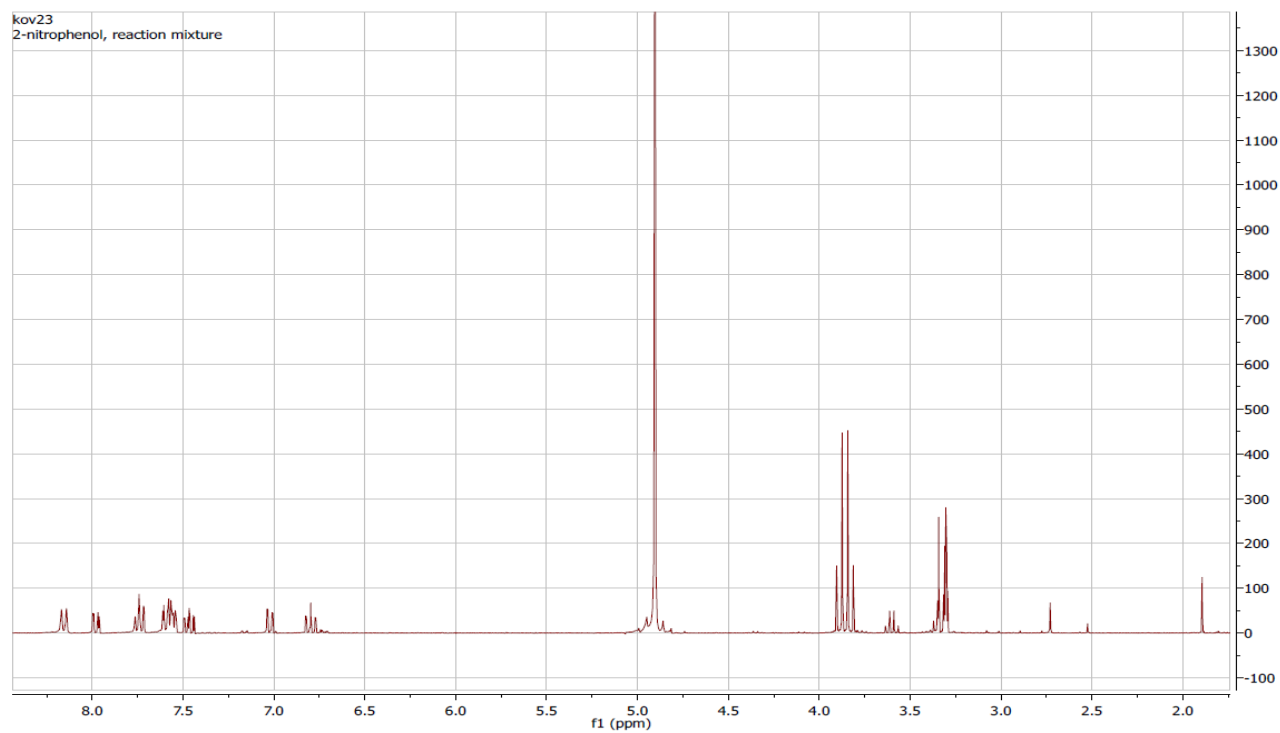

### Isolated phenol **4i** – procedure B

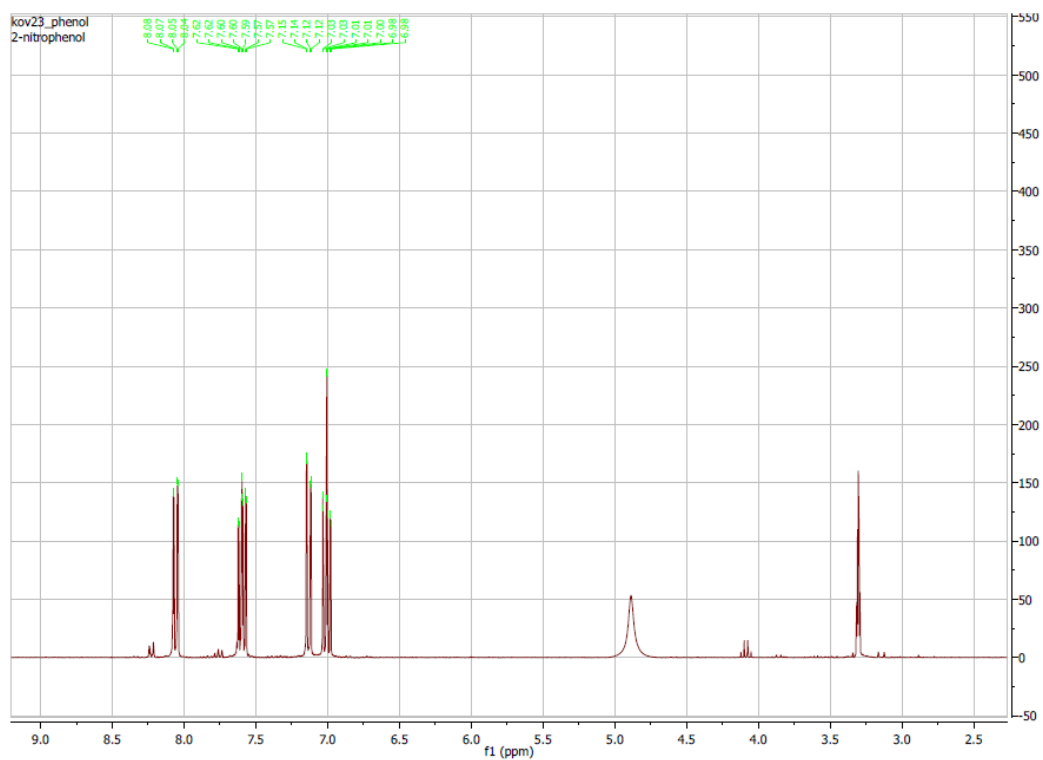

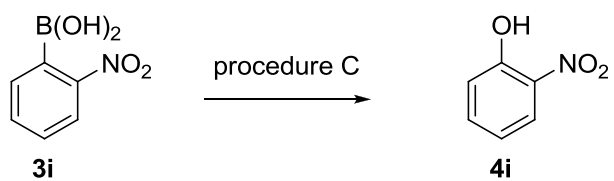

### Reaction mixture – procedure C

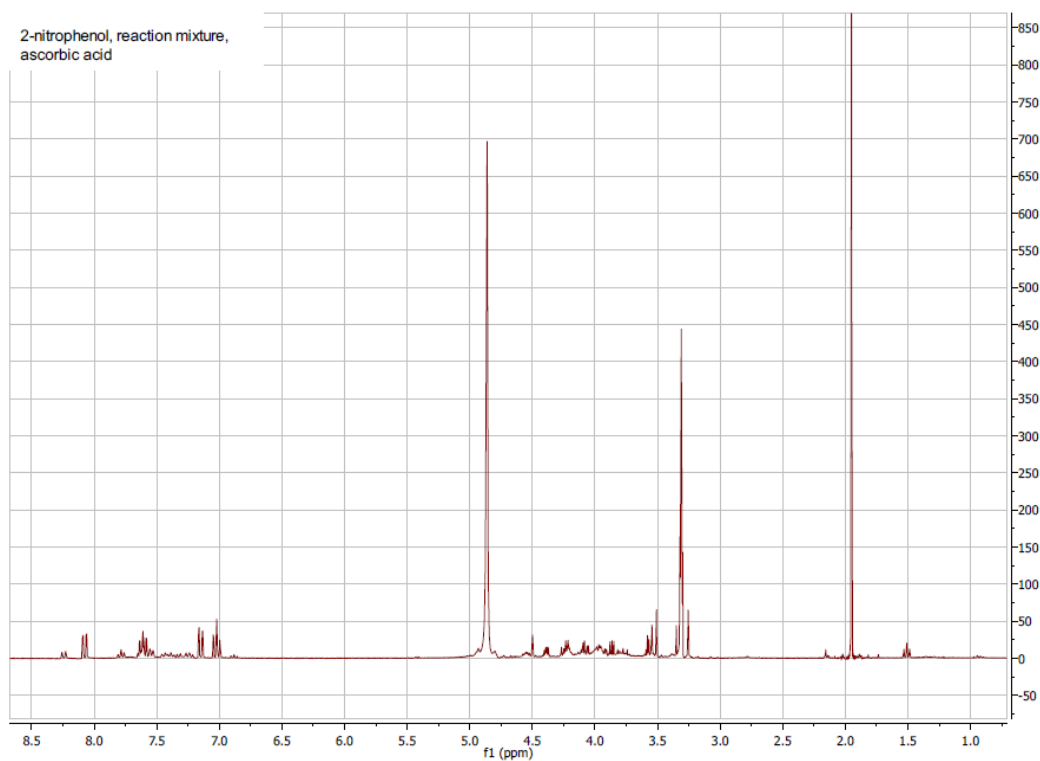

### Isolated phenol **4i** – procedure C

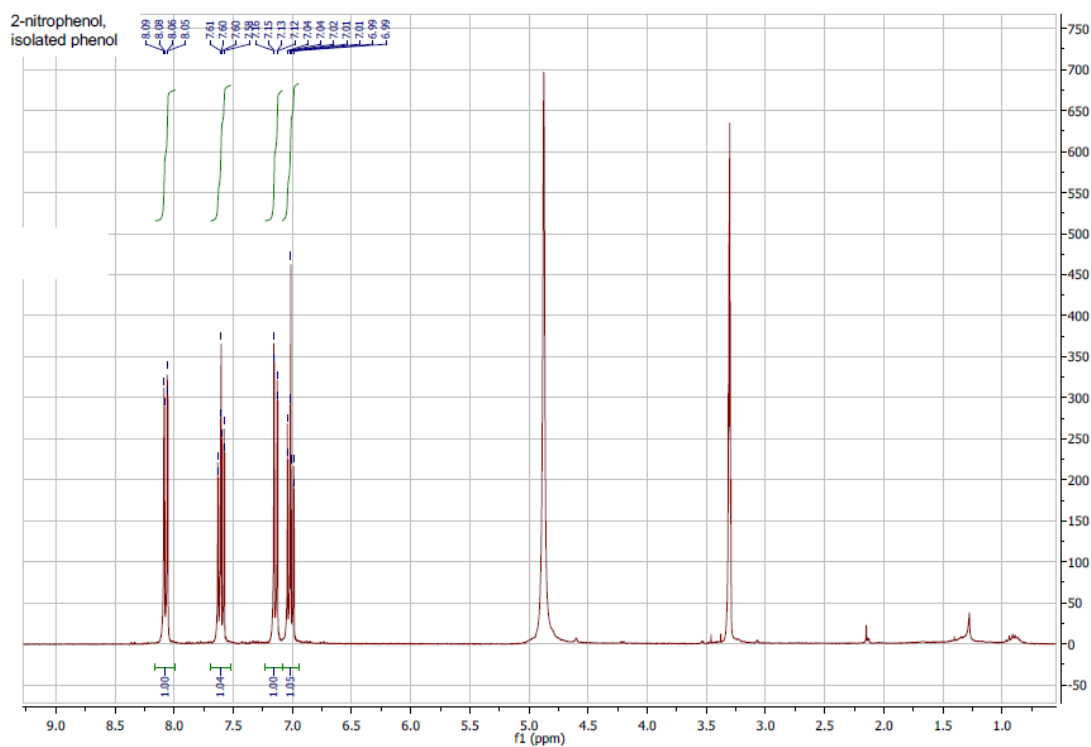

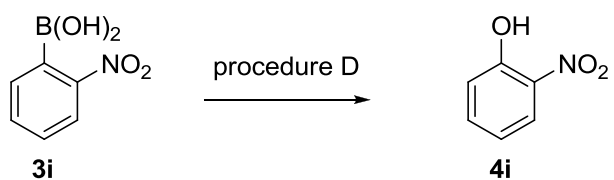

Reaction mixture – procedure D

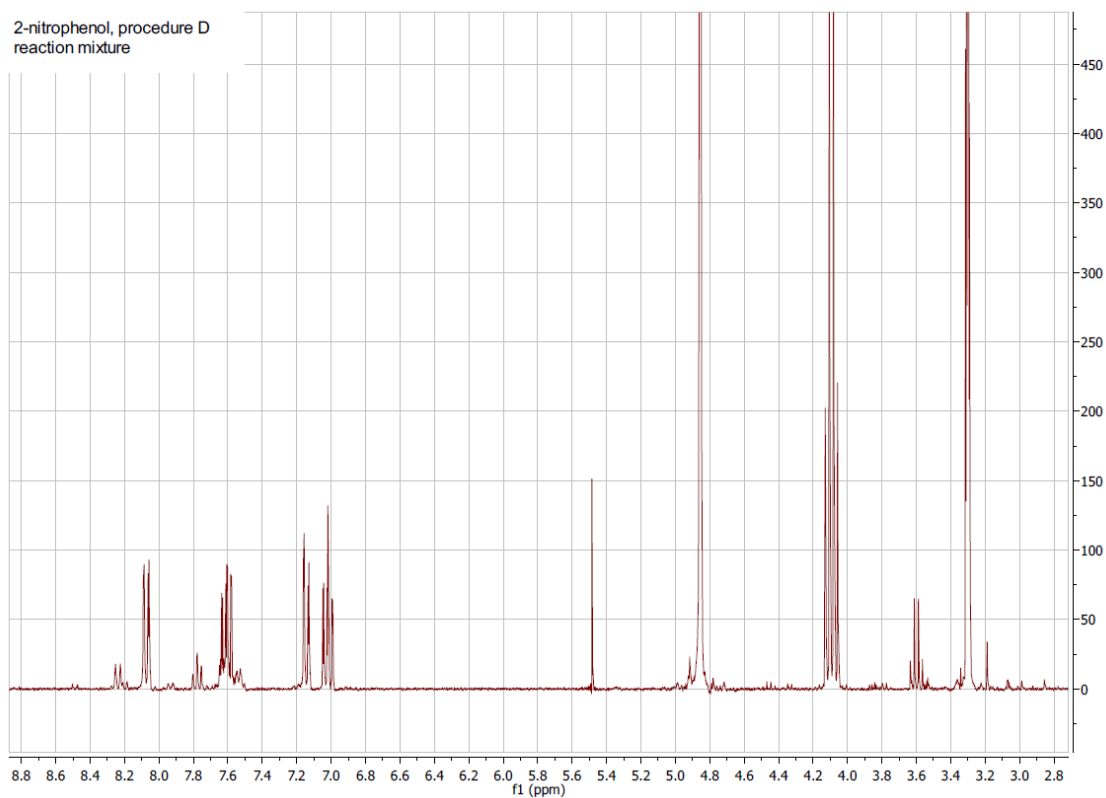

Isolated phenol **4i** – procedure D ( $^1\text{H}$  and  $^{13}\text{C}$  NMR)

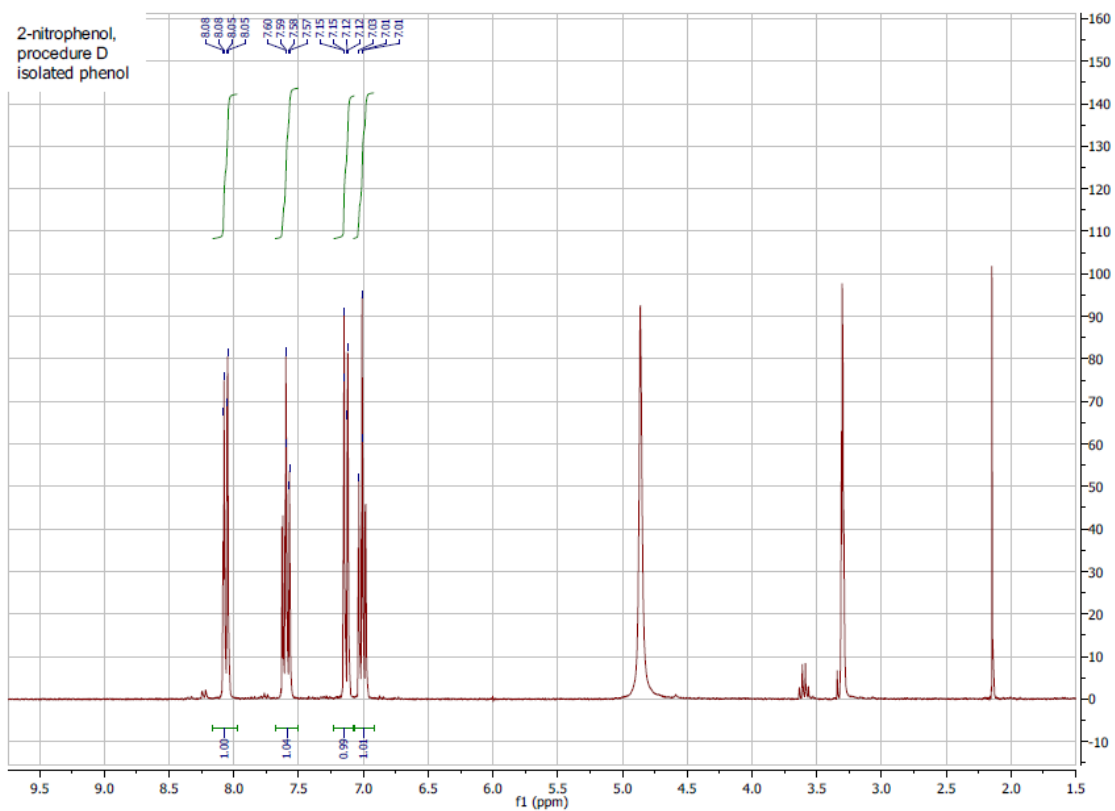

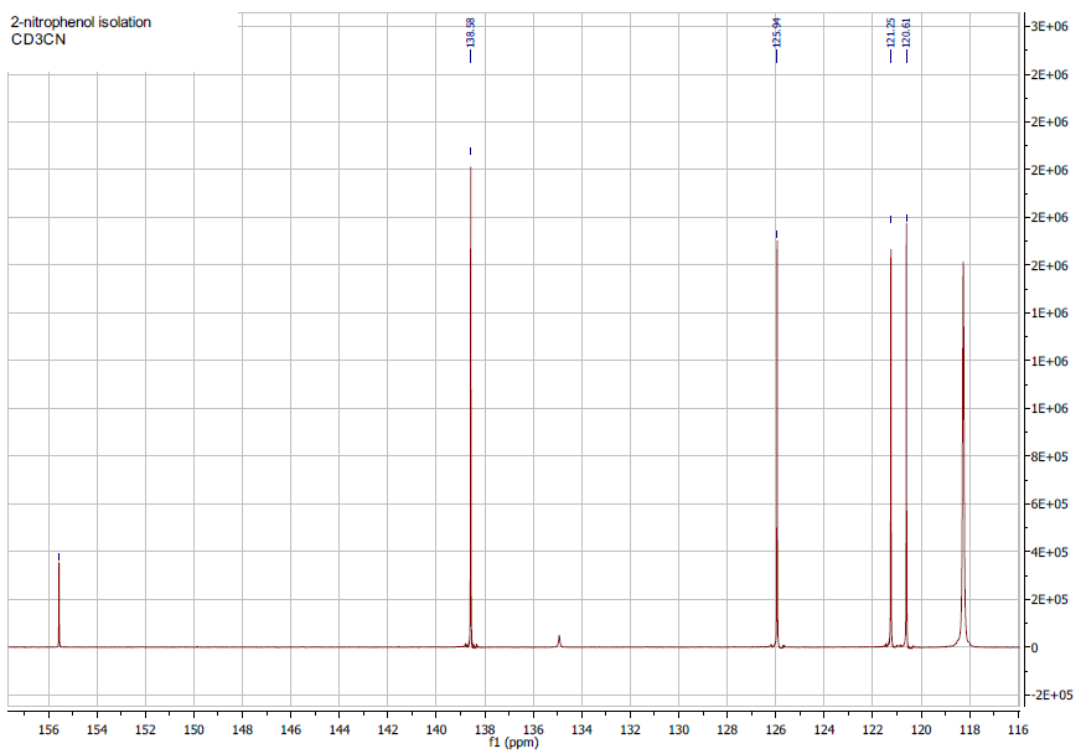

#### 4-Chlorophenol (4j)

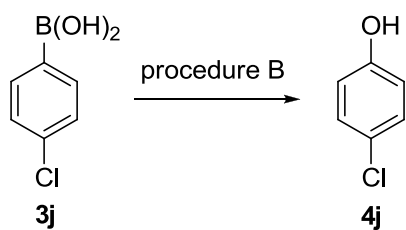

Reaction mixture

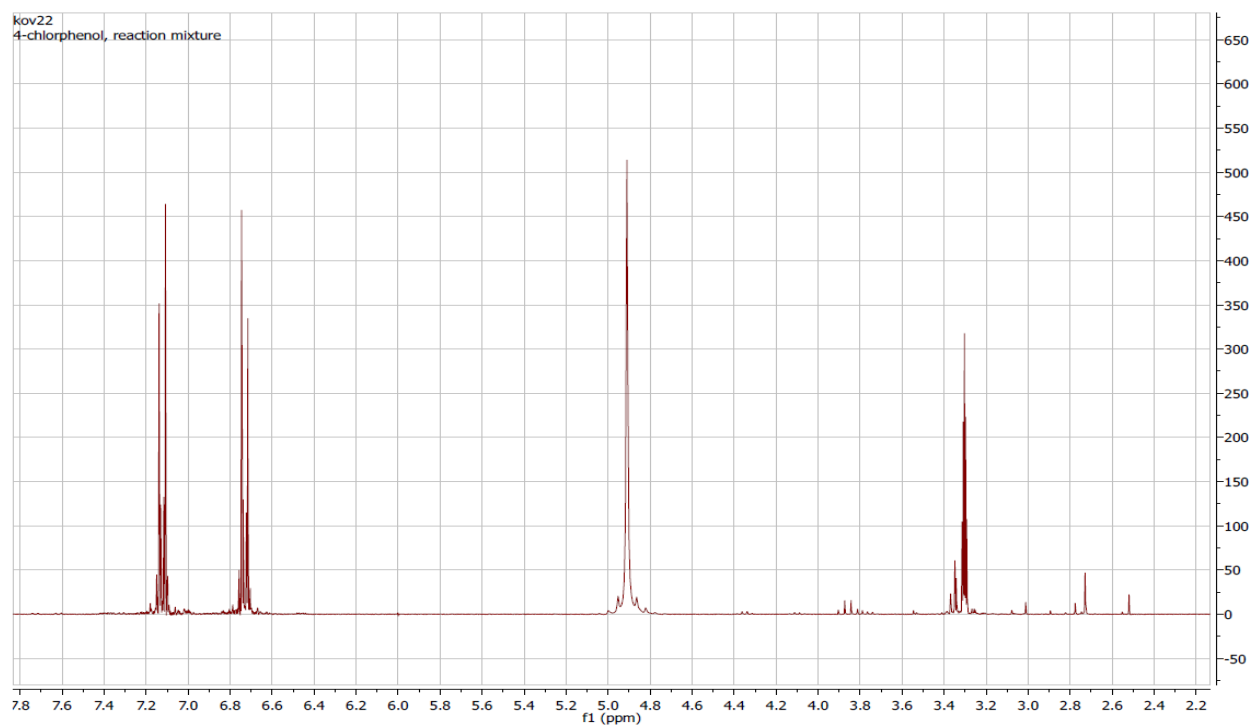

# Isolated phenol **4j** ( $^1\text{H}$ and $^{13}\text{C}$ NMR)

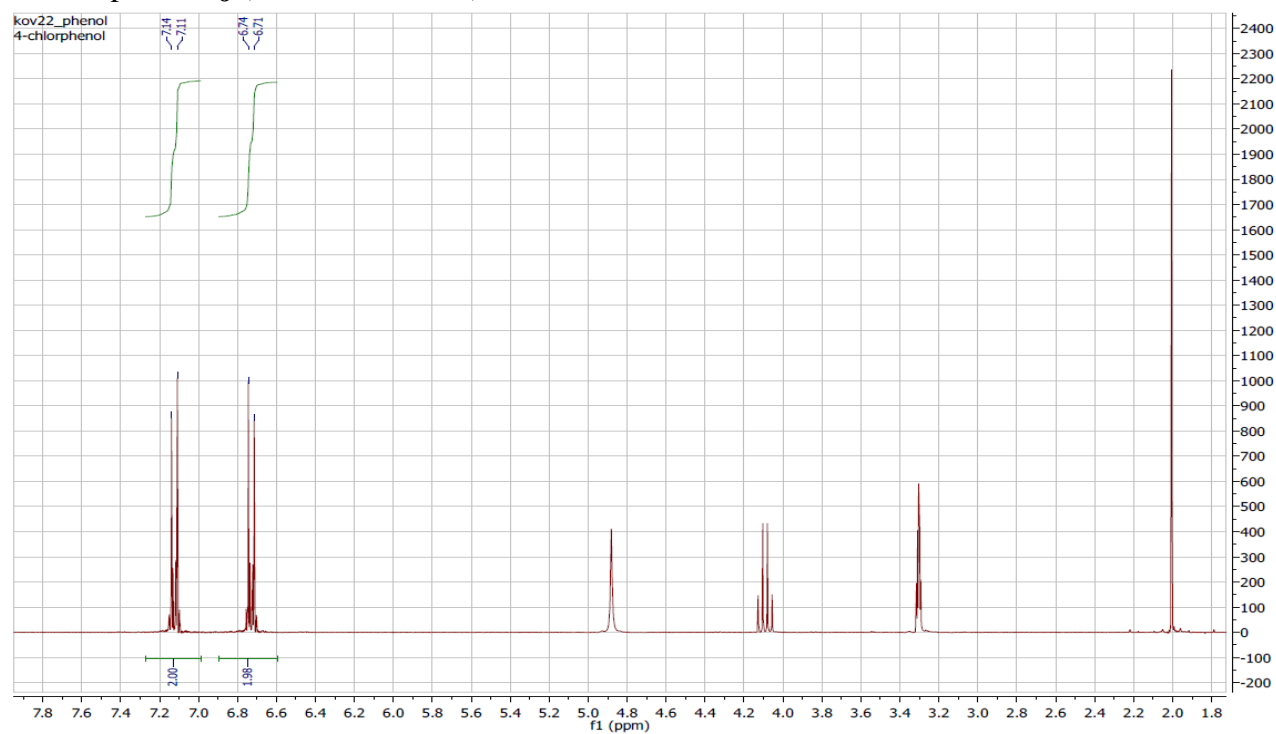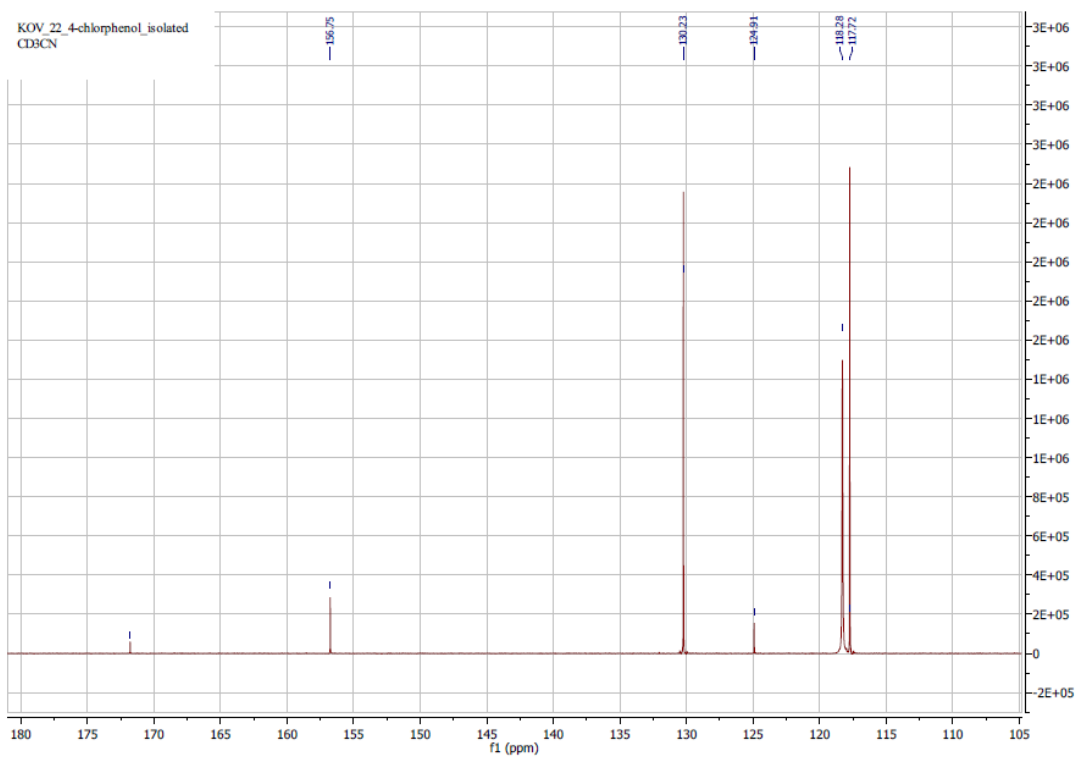



### 3-Chlorophenol (4k)

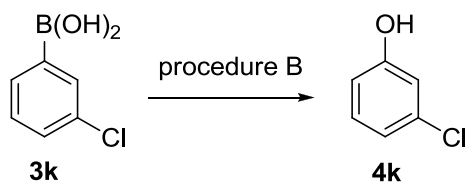

Reaction mixture

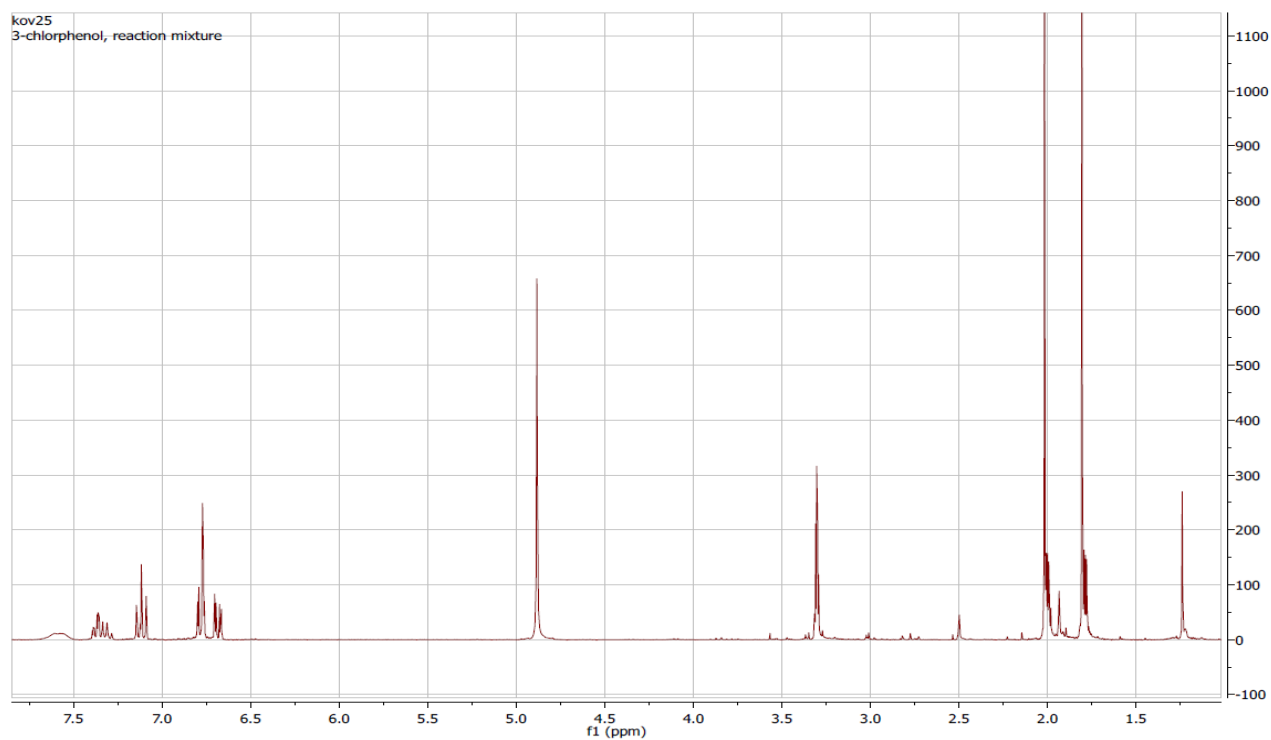

Isolated phenol **4k** ( $^1\text{H}$  and  $^{13}\text{C}$  NMR)

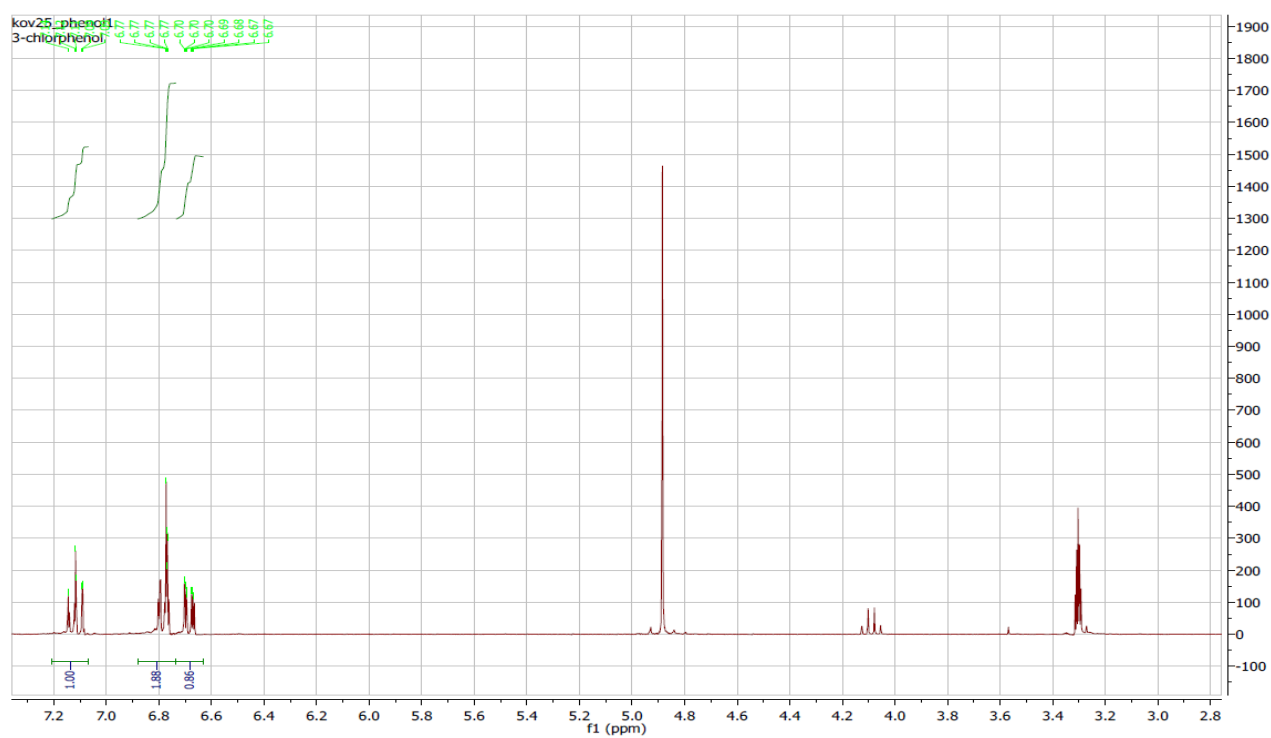

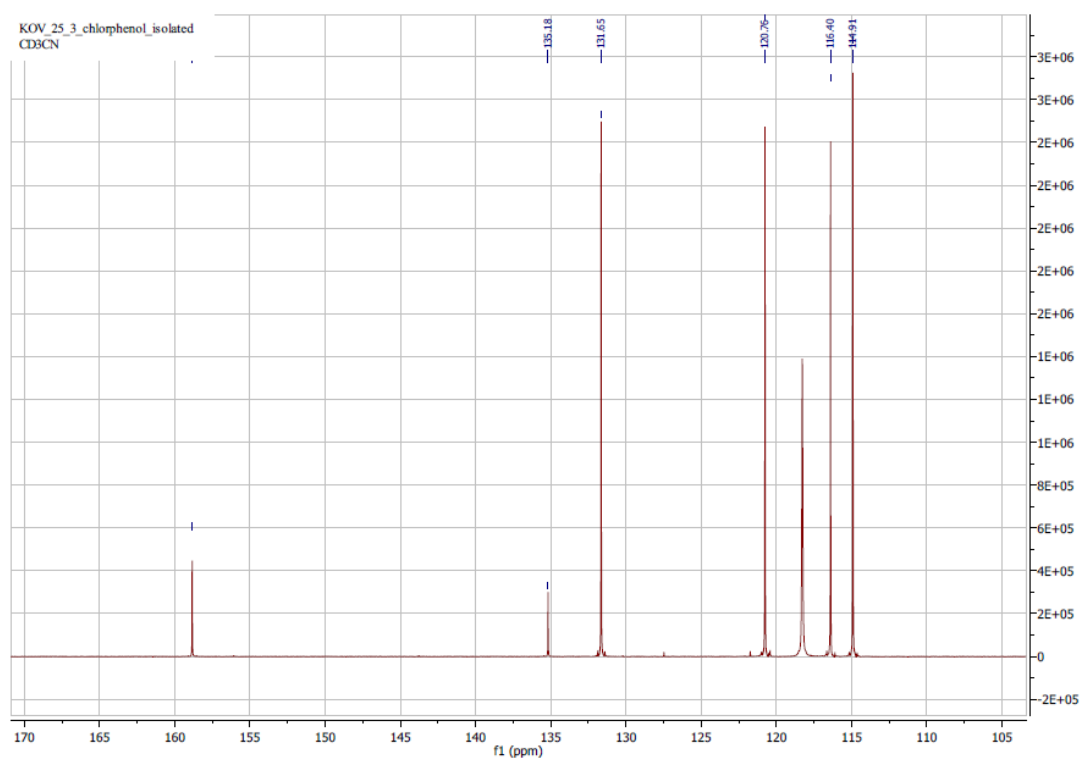

## 2-Chlorophenol (4l)

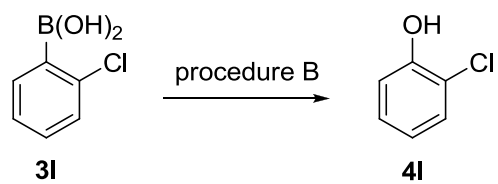

## Reaction mixture

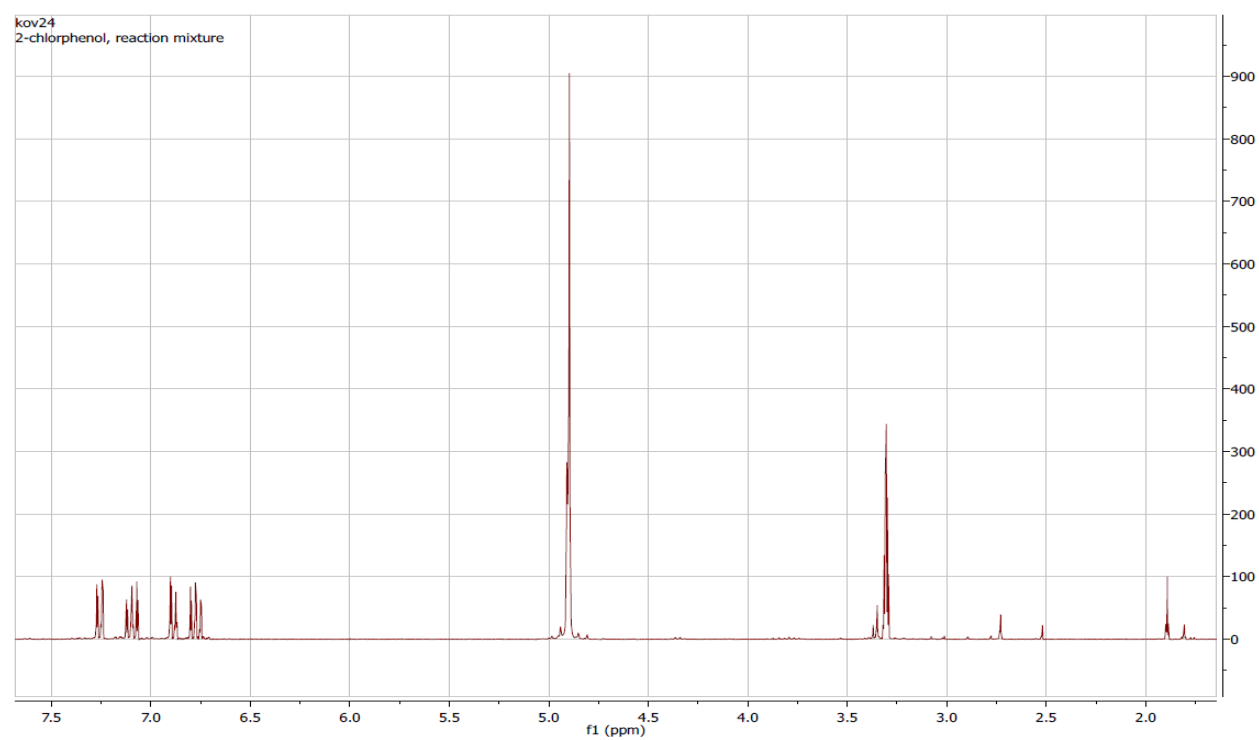

# Isolated phenol **4l** ( $^1\text{H}$ and $^{13}\text{C}$ NMR)

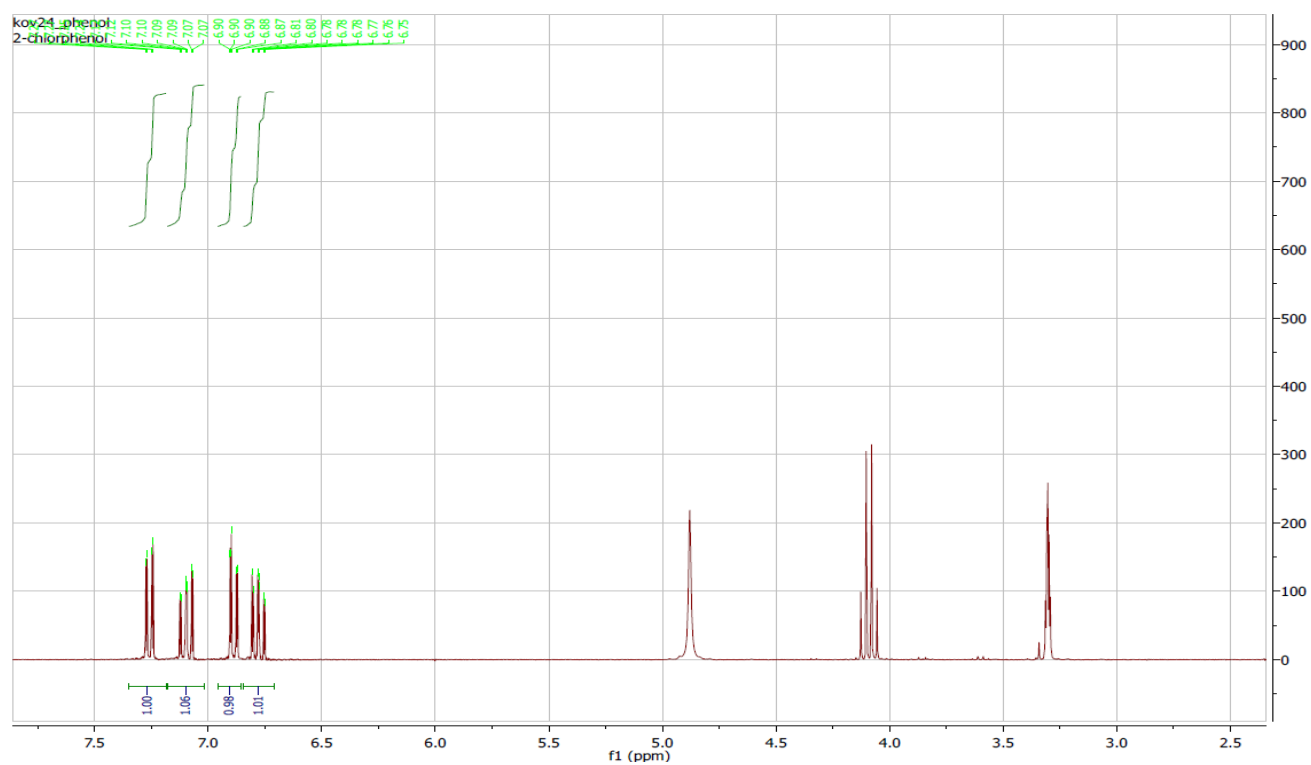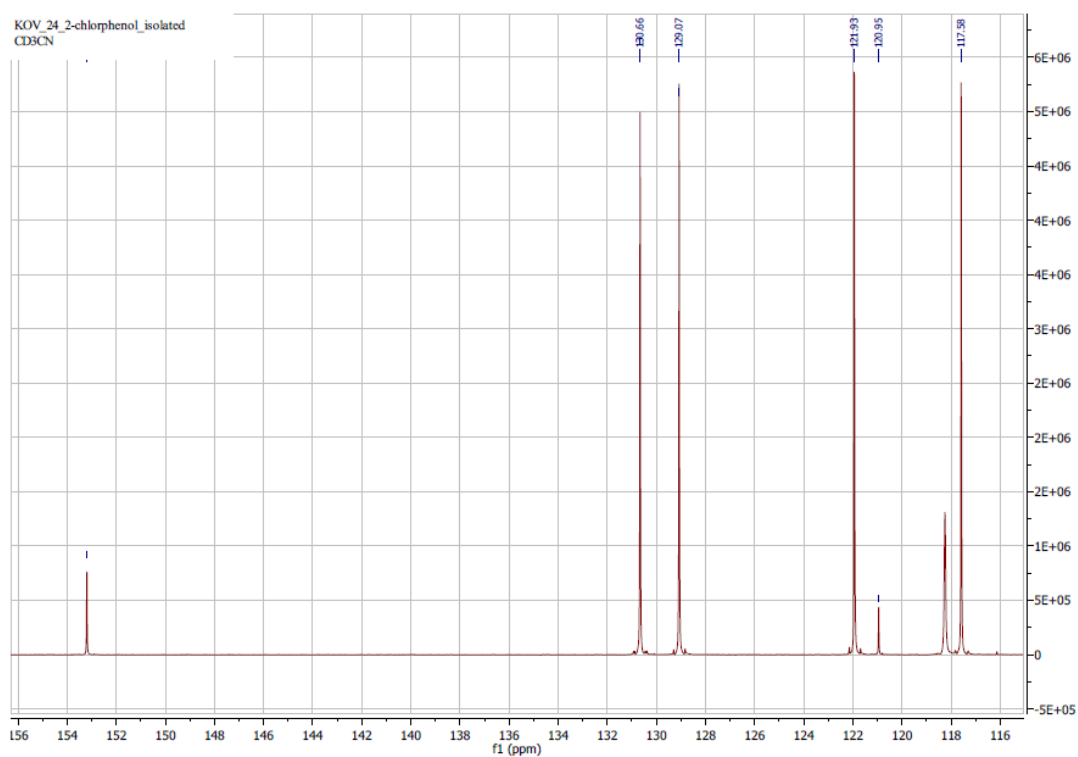

### 4-Vinylphenol (4m)

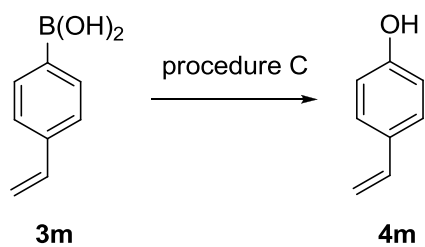

## Reaction mixture

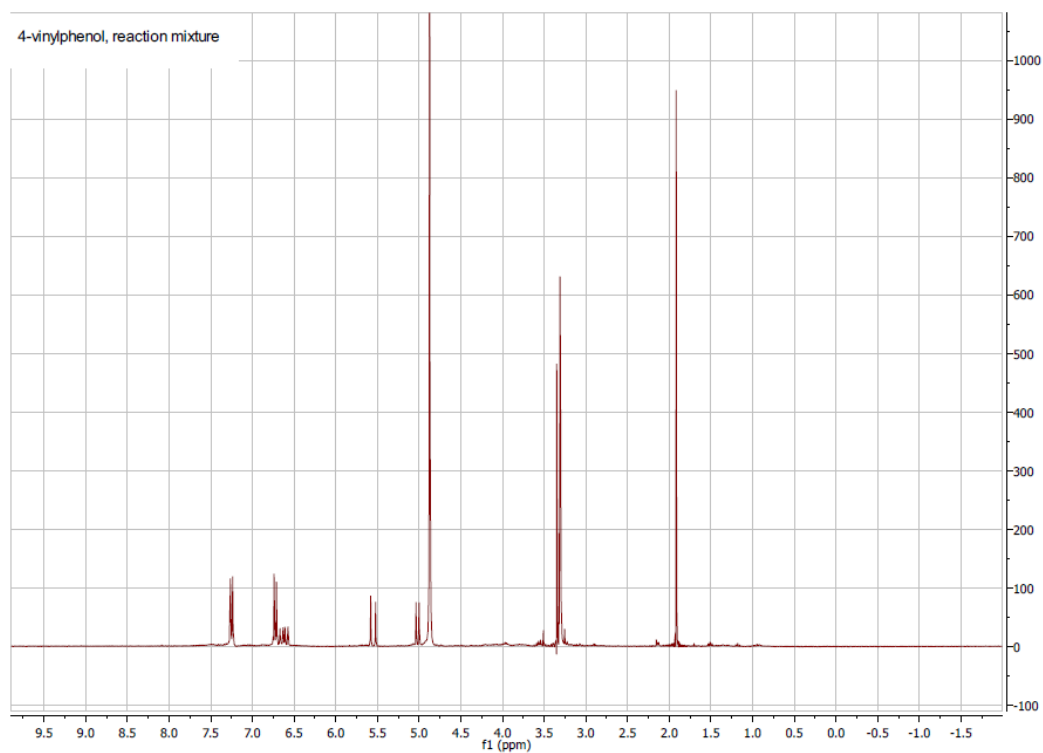Isolated phenol **4m** (<sup>1</sup>H and <sup>13</sup>C NMR)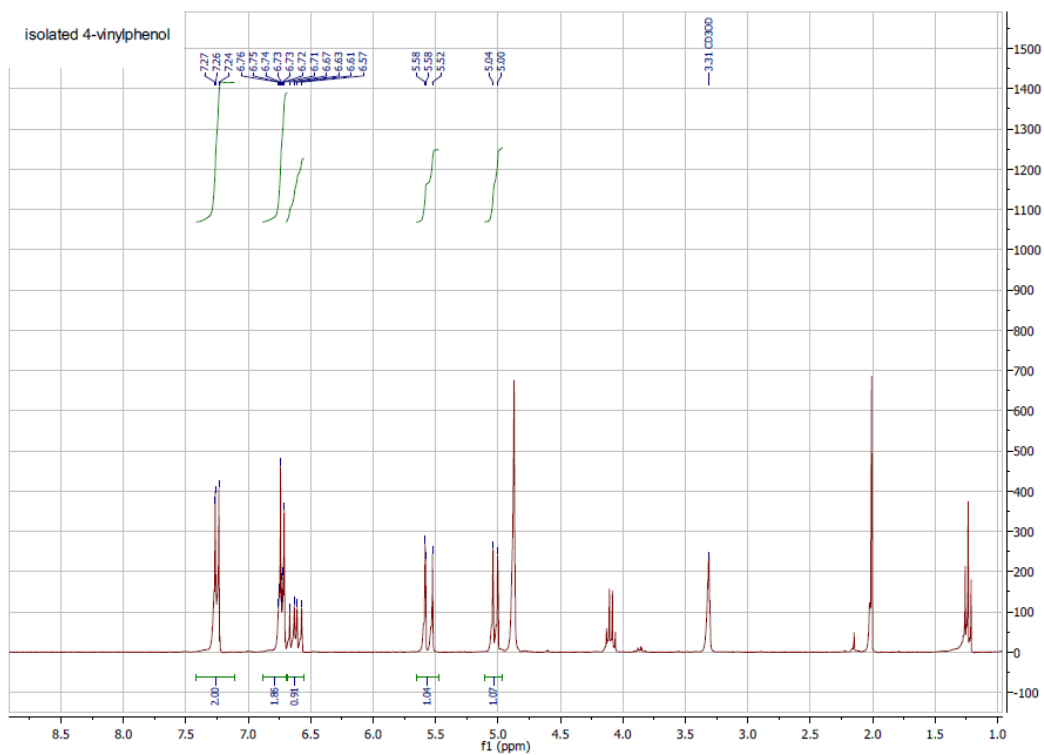

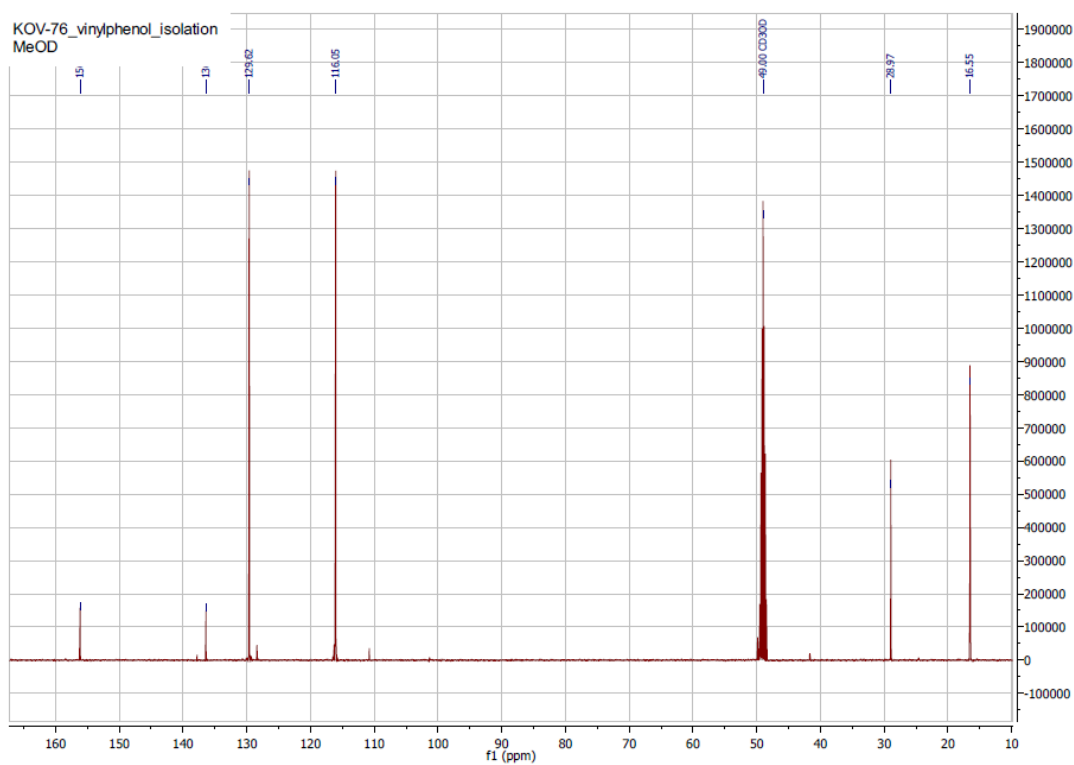

### 3-Pyridinylphenol (4n)

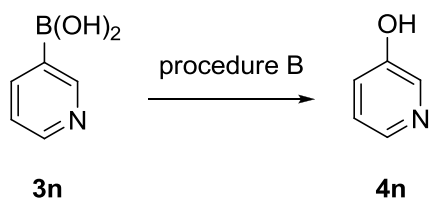

### Reaction mixture

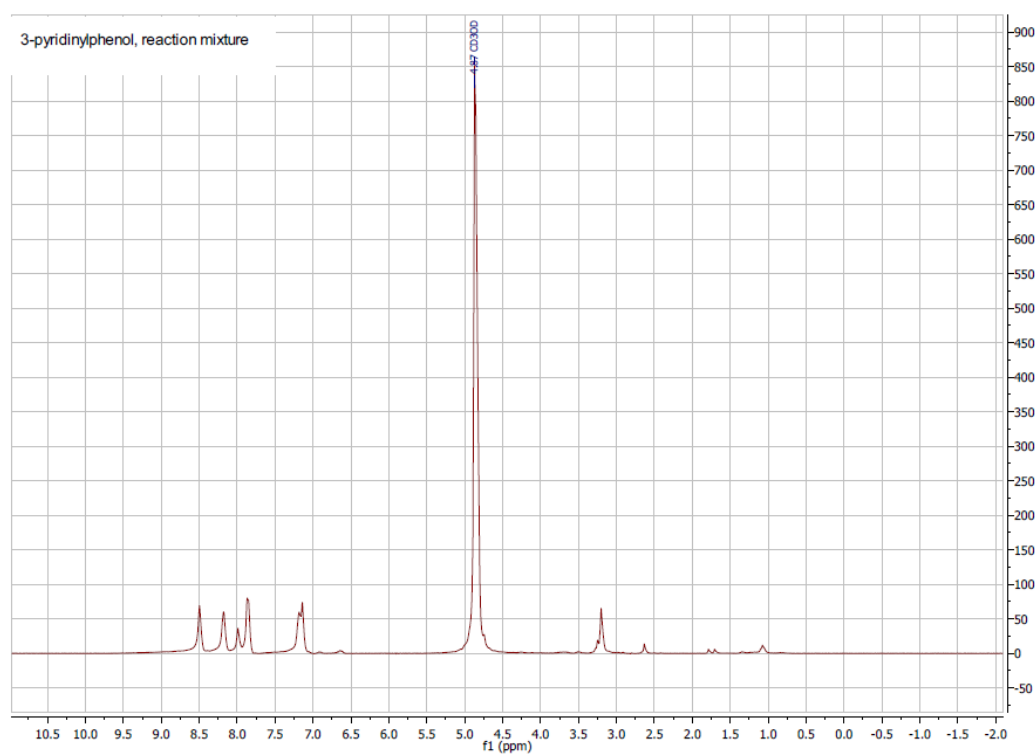

# Isolated phenol **4n** ( $^1\text{H}$ and $^{13}\text{C}$ NMR)

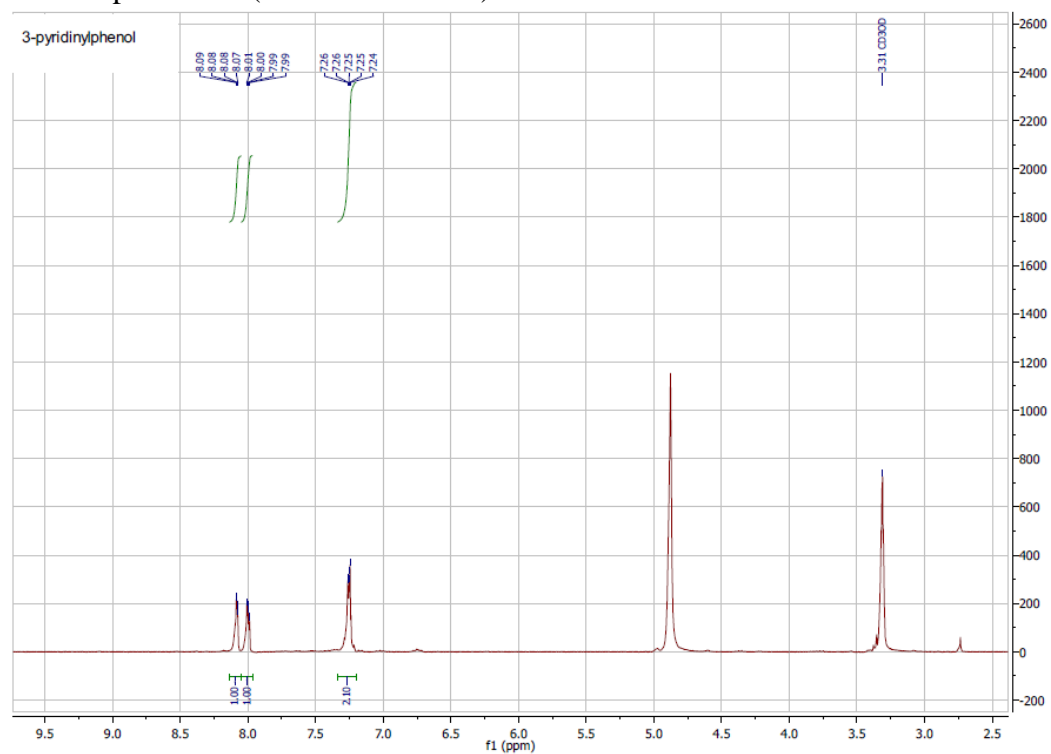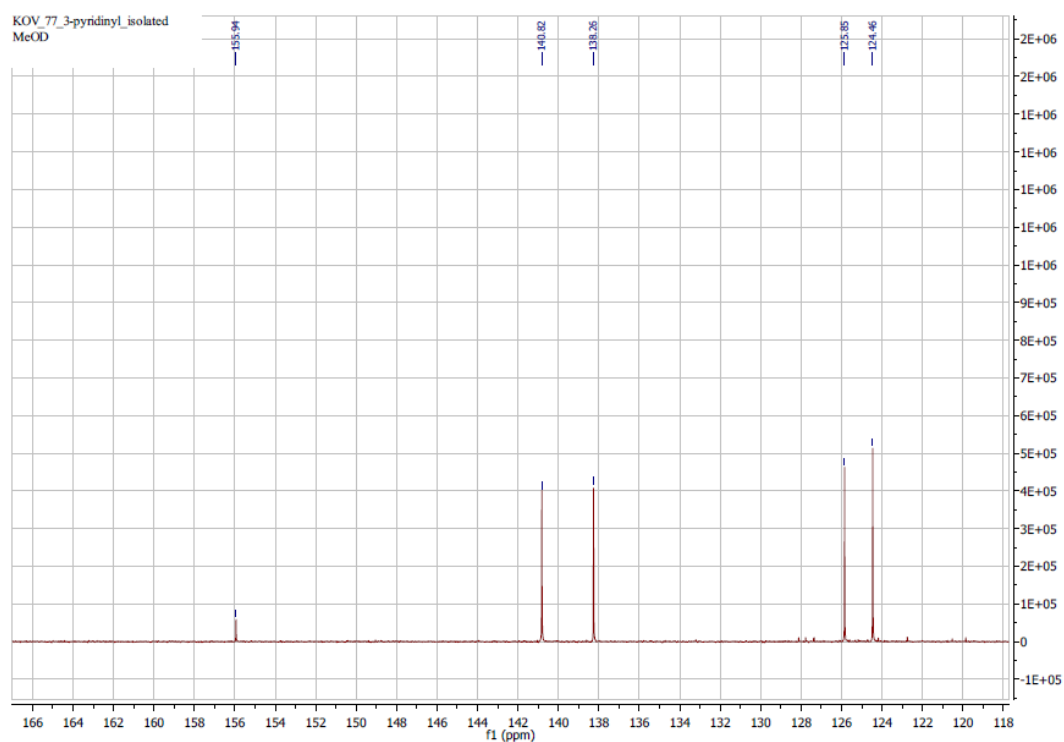

### 4-(Hydroxymethyl)phenol (4o)

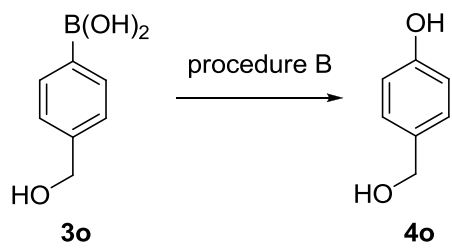

## Reaction mixture

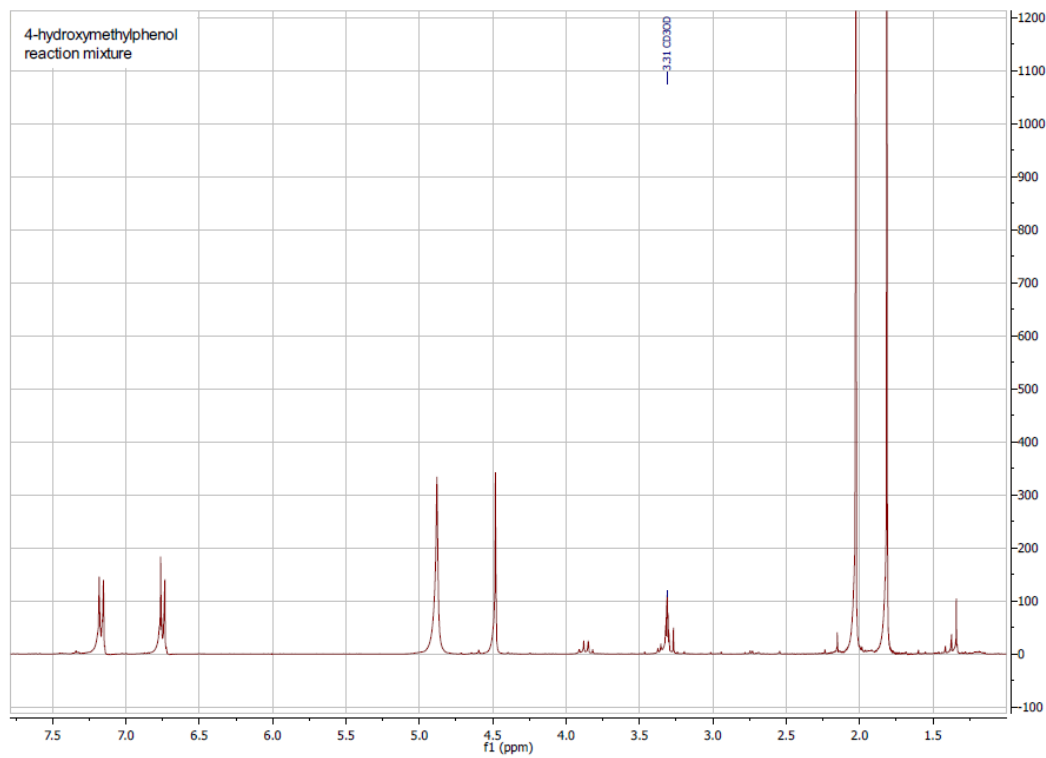Isolated phenol **4o** (<sup>1</sup>H and <sup>13</sup>C NMR)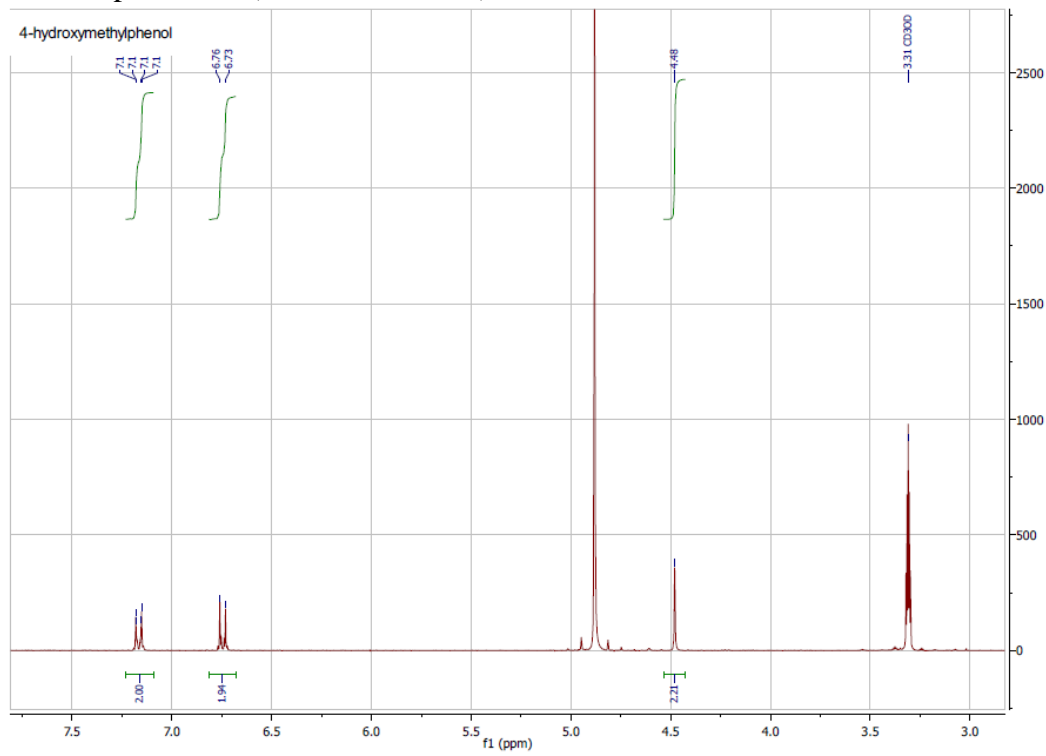

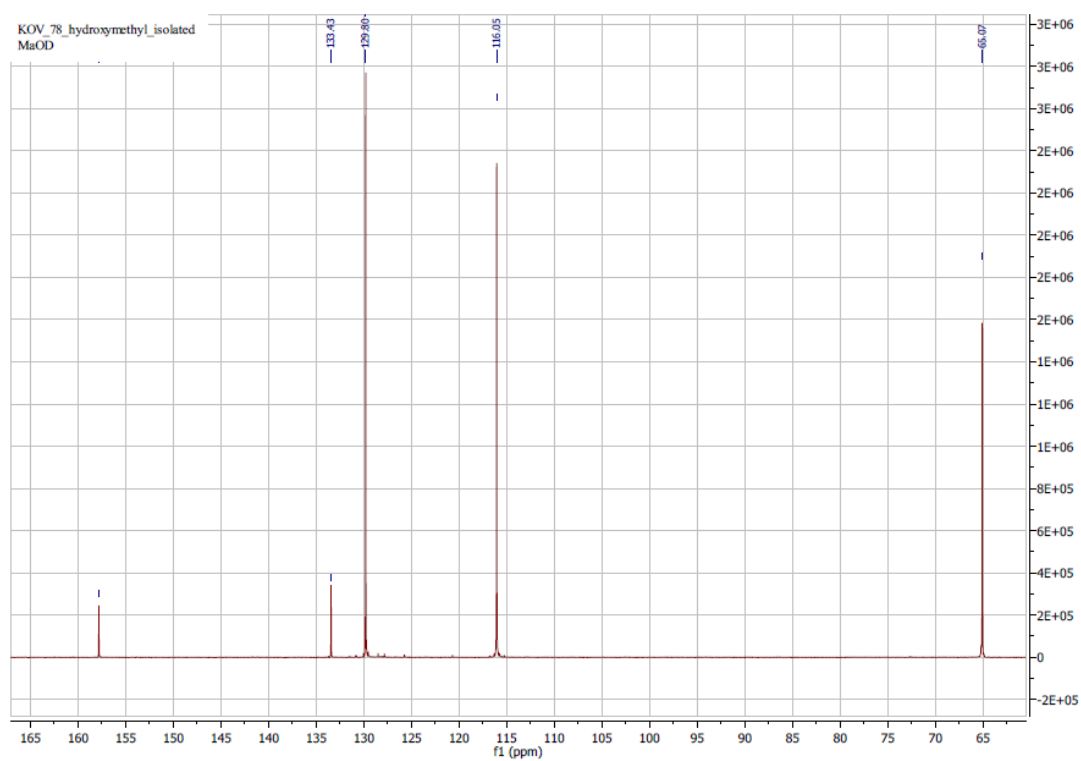

### 4-Hydroxybenzaldehyde (4p)

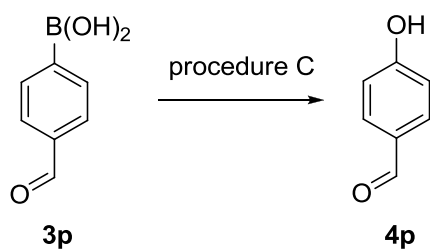

### Reaction mixture

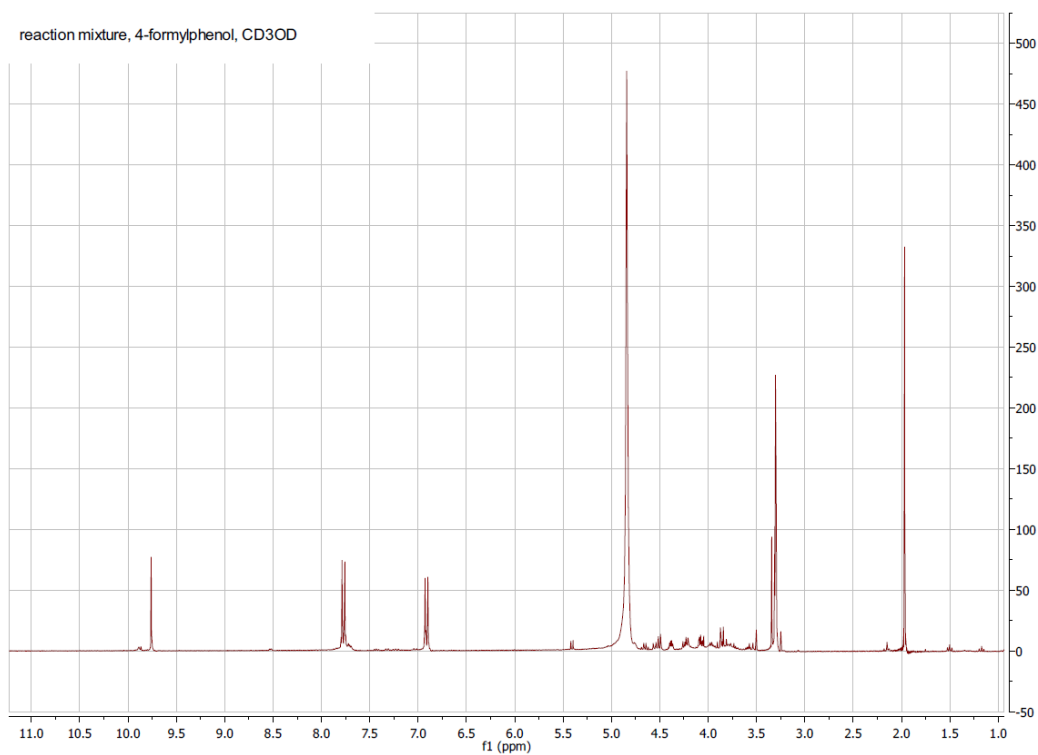



# Isolated phenol **4p** ( $^1\text{H}$ and $^{13}\text{C}$ NMR)

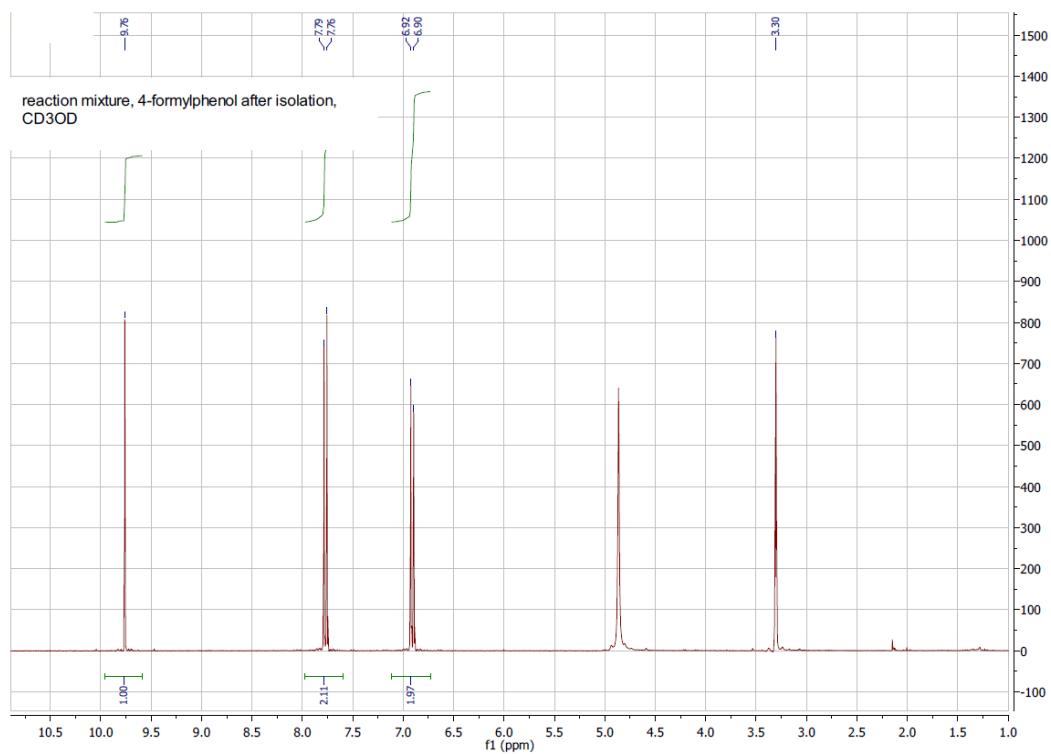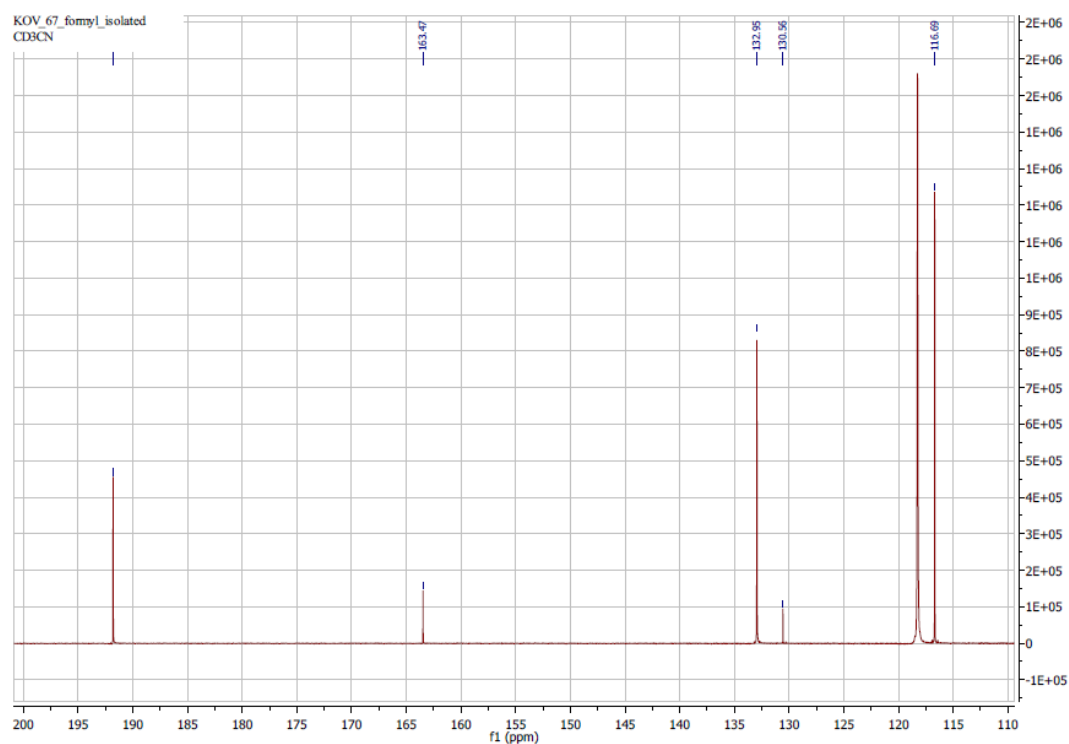

## Bis(4-hydroxybenzylidene)hydrazine (5)

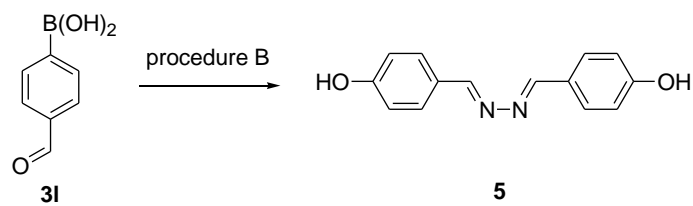

Isolated conjugate 5 (<sup>1</sup>H and <sup>13</sup>C NMR)

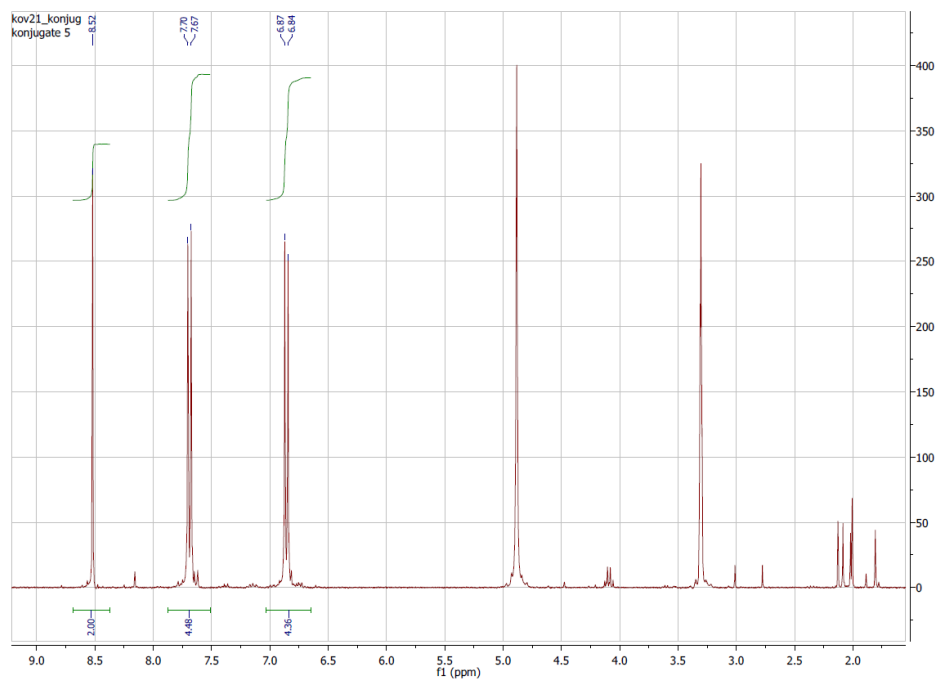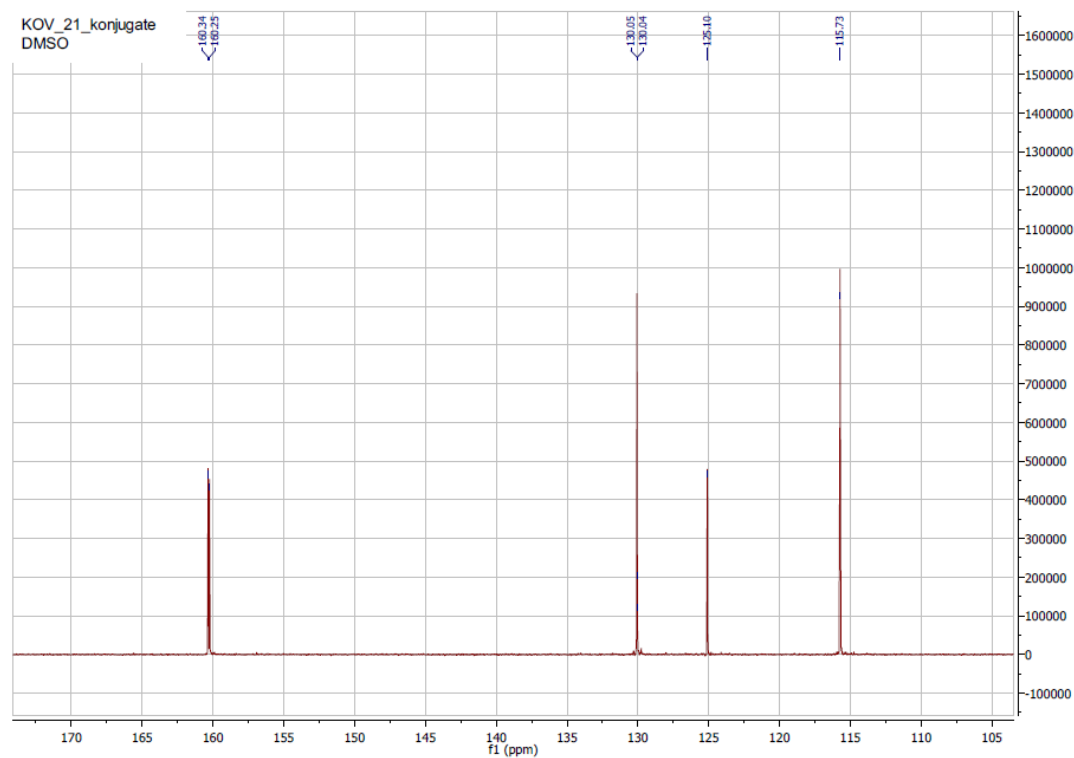

## Cyclohexanol (7a)

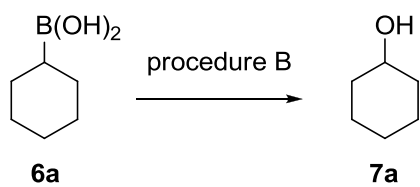

## Reaction mixture

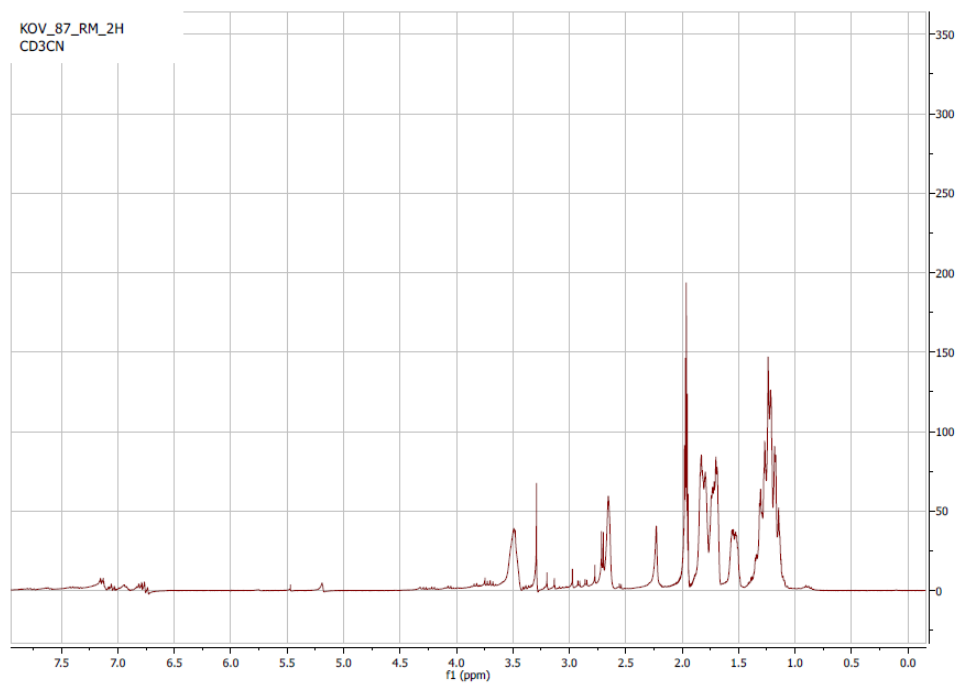

## Isolated alcohol **7a** ( $^1\text{H}$ and $^{13}\text{C}$ NMR)

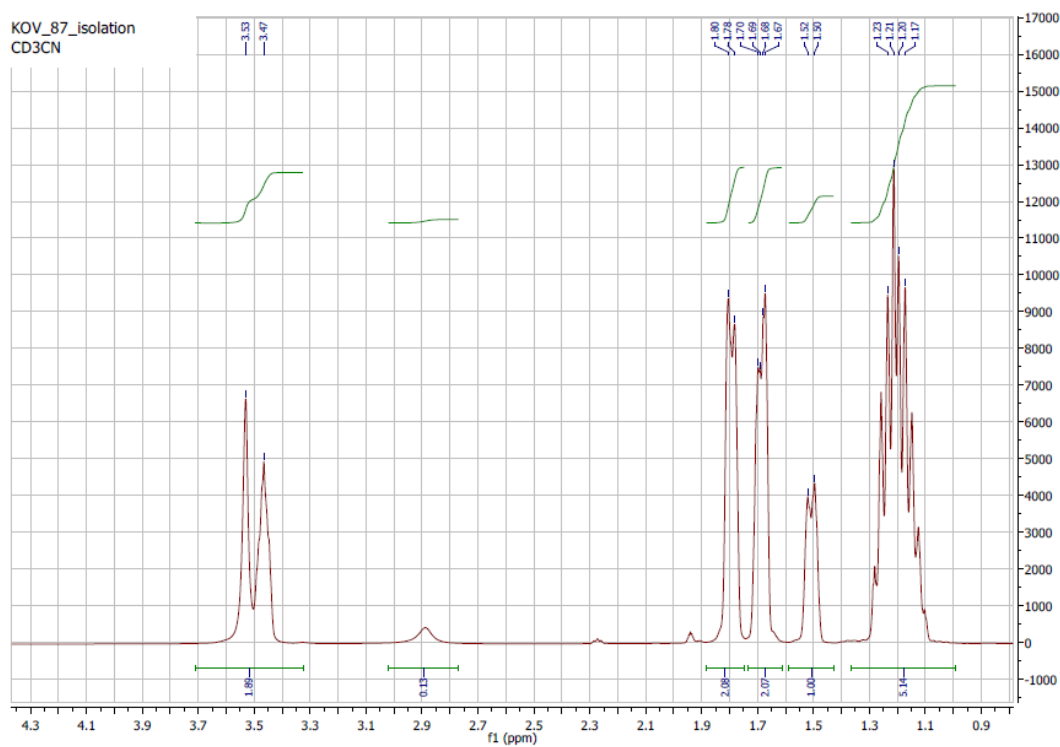

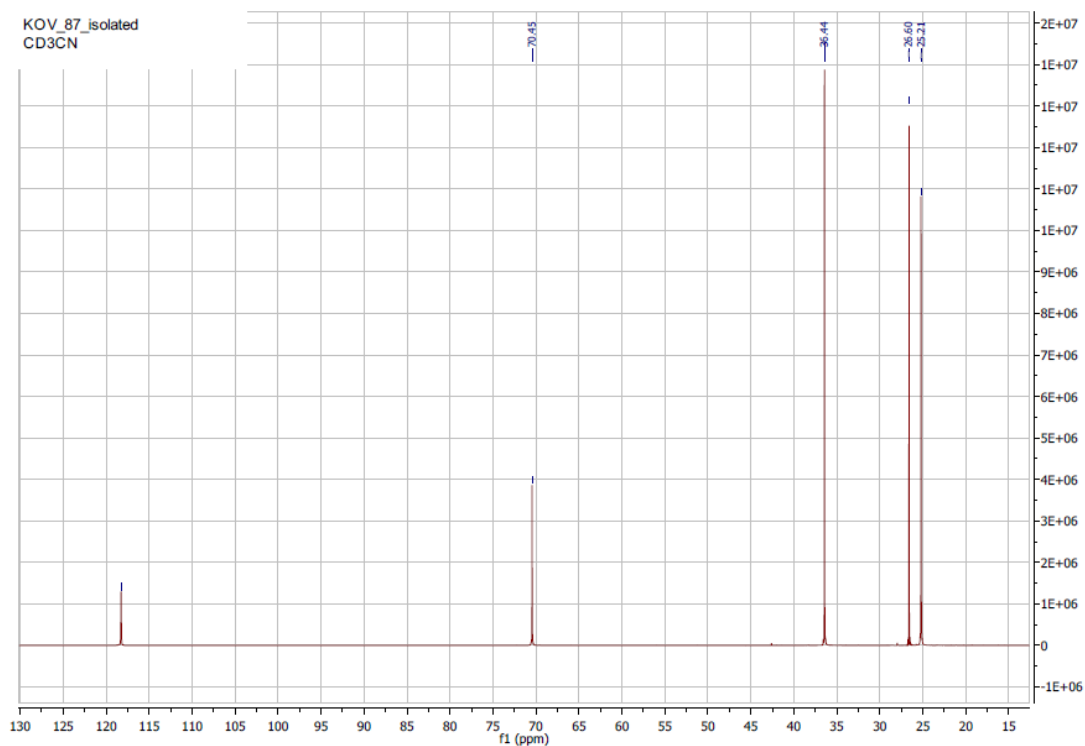

### Dodecanol (7b)

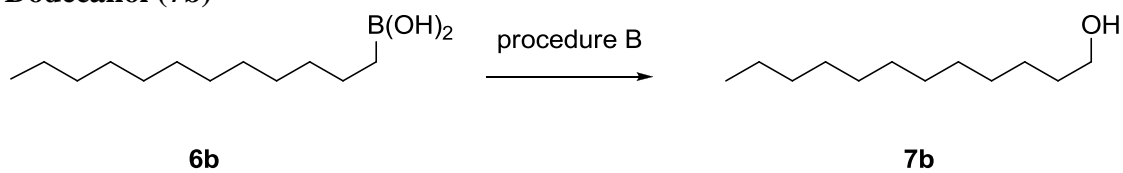

### Reaction mixture

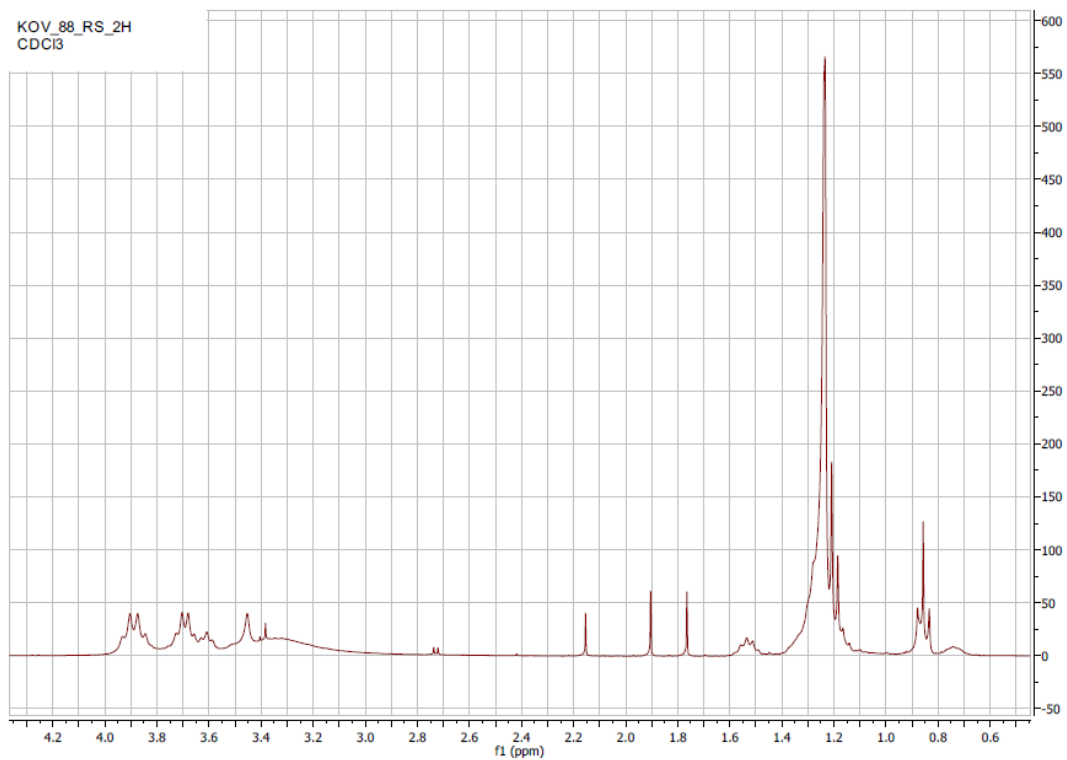

Isolated alcohol **7b** ( $^1\text{H}$  and  $^{13}\text{C}$  NMR)

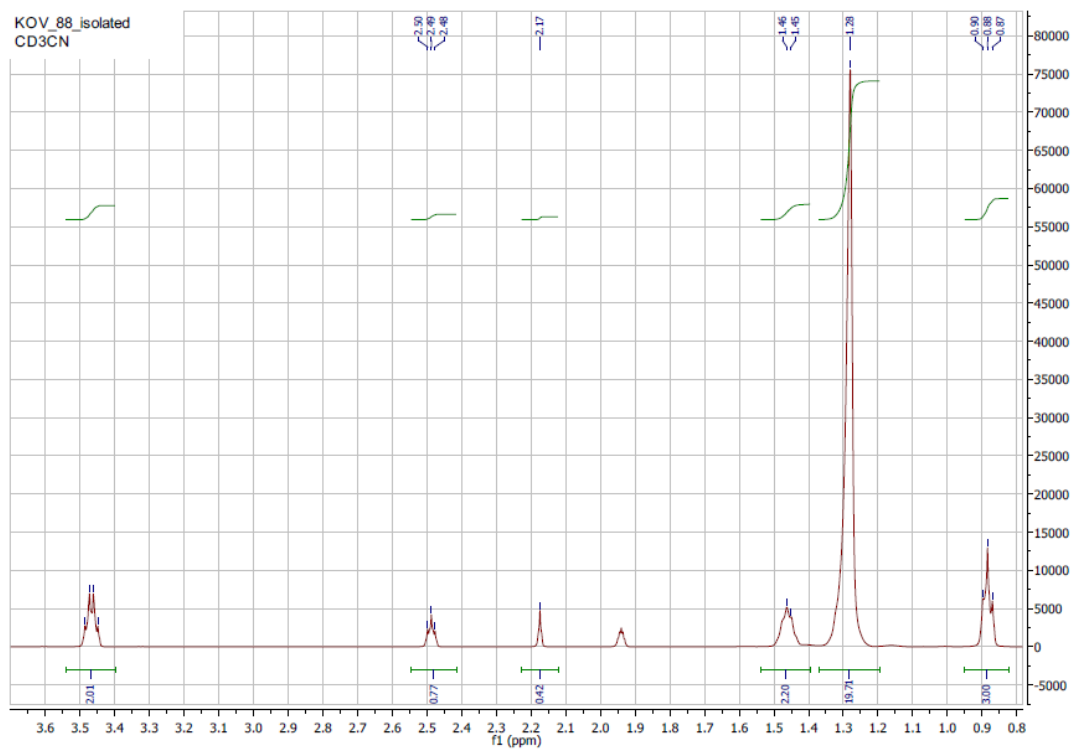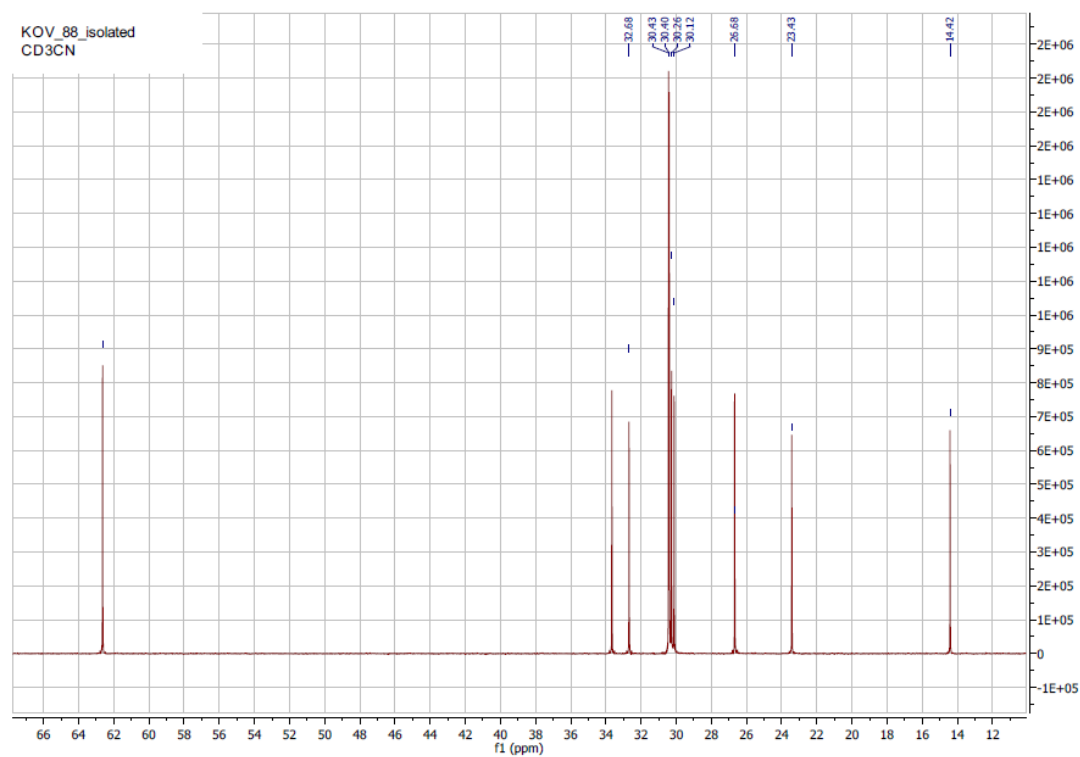

## S4 Course of oxidative hydroxylations monitored by $^1\text{H}$ and $^{11}\text{B}$ NMR

### Hydroxylations carried out on analytical scale – general procedure E

Boronic acid ( $7.9 \times 10^{-5}$  mol) and reducing agent ( $10.6 \times 10^{-5}$  mol) and other additives were dissolved or suspended in 0.6 mL of solvent and starting  $^1\text{H}$  NMR and  $^{11}\text{B}$  NMR (blank) was measured. Then catalyst **2** ( $0.4 \times 10^{-5}$  mol) was added and reaction mixture was transferred to small flask under balloon with oxygen and shaken. Spectra for kinetic studies were performed in defined times and the reaction mixture was every time transported from flask to NMR cell and after measurement again to flask to continue the reaction.  $\text{D}_2\text{O}$ ,  $\text{CD}_3\text{CN}$  or methanol- $d_4$  were used as deuterated solvents.

### Effect of hydrazine and ascorbic acid on $^{11}\text{B}$ NMR spectra.

Phenylboronic acid **3a** was dissolved in the mixture of  $\text{CF}_3\text{CH}_2\text{OH}$  (400  $\mu\text{L}$ ) and  $\text{CD}_3\text{OD}$  (200  $\mu\text{L}$ ). Hydrazine hydrate or ascorbic acid (full amount 7.92  $\mu\text{L}$ ; 1.3 eq.) was added by parts to this solution into NMR cell and the broadening of boron signal in  $^{11}\text{B}$  NMR spectra was observed. No change of  $^{11}\text{B}$  NMR spectra was observed after addition of ascorbic acid. See below.

$^{11}\text{B}$  NMR spectra,  $\text{CD}_3\text{OD}$ , hydrazine hydrate adding

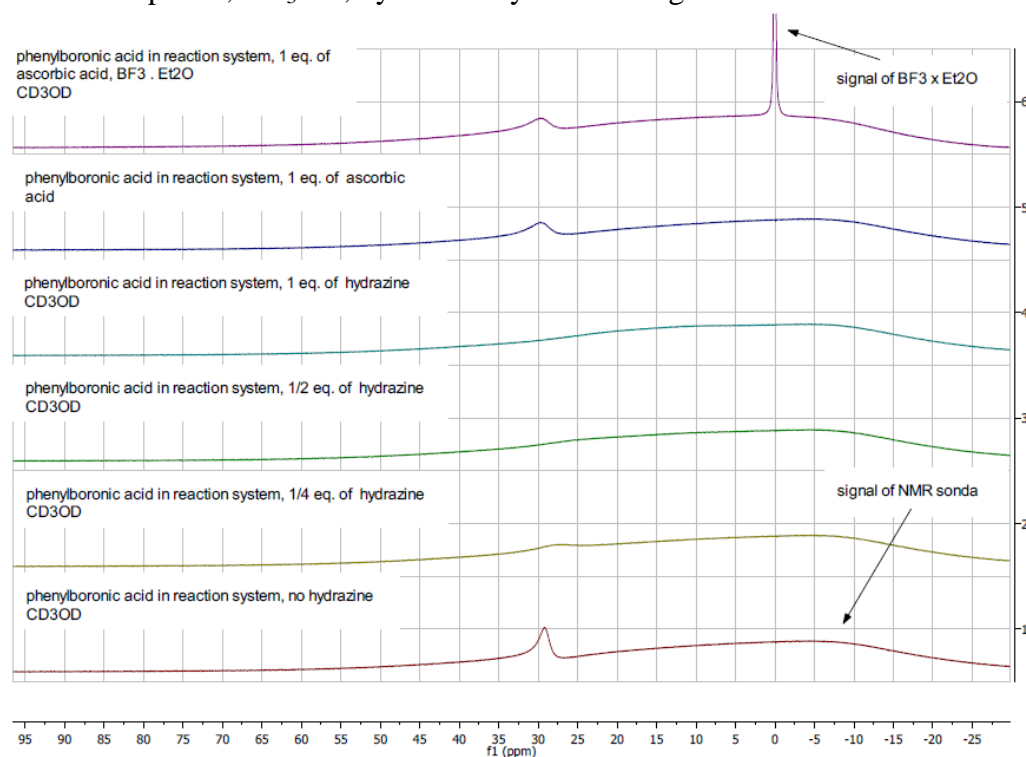

## Monitoring of oxidation of 4-tolylboronic acid (3d) to 4-methylphenol (4d) in the mixture of organic solvents

Reaction was carried out according to general procedure E, CF<sub>3</sub>CH<sub>2</sub>OH (350 uL), CD<sub>3</sub>CN (200 uL), D<sub>2</sub>O (150 uL), ascorbic acid (18.31 mg; 10.4 x 10<sup>-5</sup> mol), sodium acetate (0.34 mg; 10.4 x 10<sup>-5</sup> mmol). (Aromatic part of spectra is shown in the main text as Figure 1)

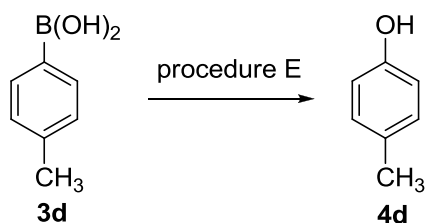

### <sup>1</sup>H NMR spectra, CD<sub>3</sub>CN – full screen

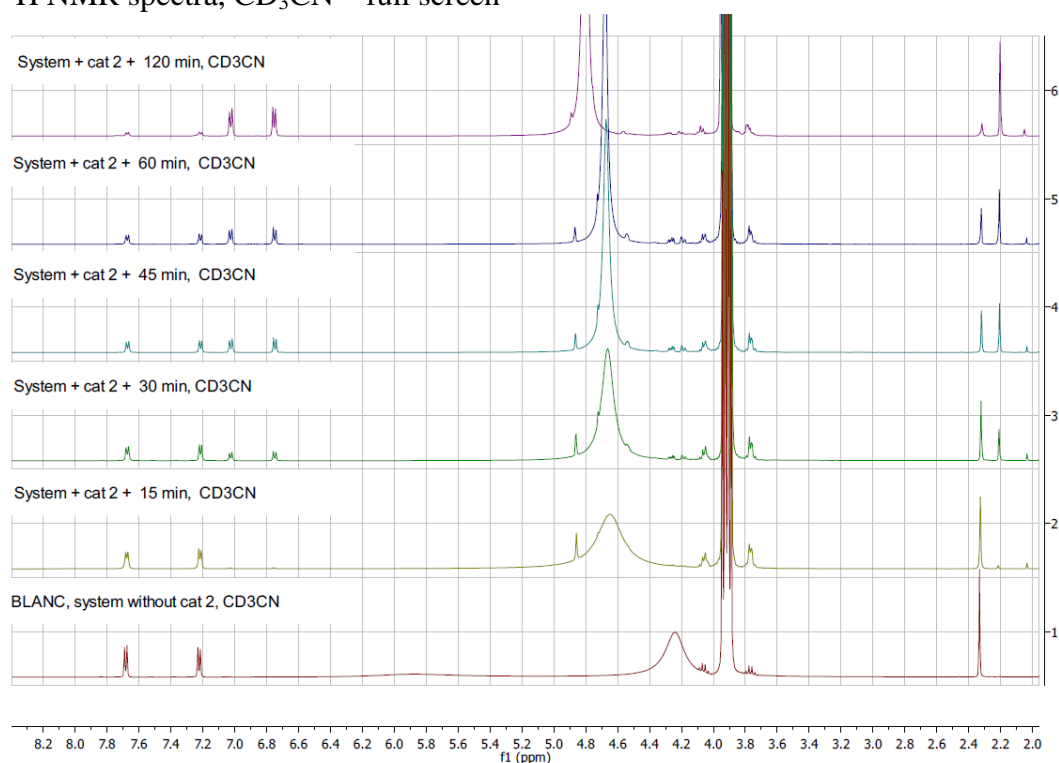

### <sup>11</sup>B NMR spectra, CD<sub>3</sub>CN – full screen

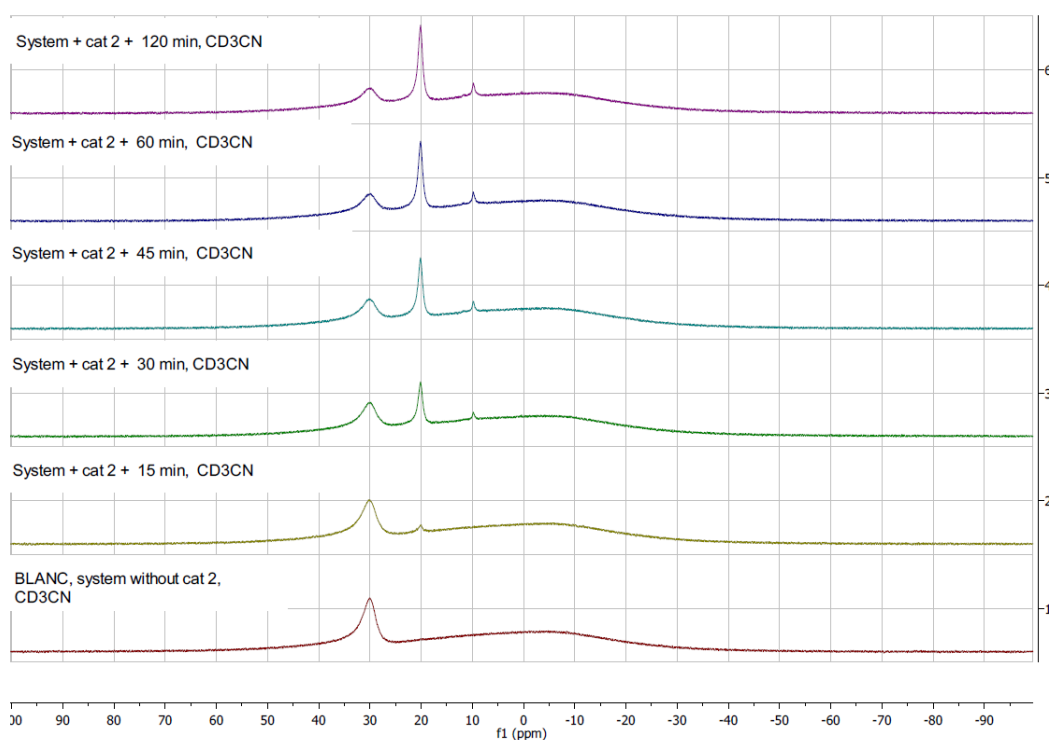

### Monitoring of oxidation of 4-tolylboronic acid (3d) to 4-methylphenol (4d) in aqueous solution

Reaction was carried out according to general procedure E, phosphate buffer pH = 7.5 (400  $\mu$ L), CD<sub>3</sub>CN (200  $\mu$ L), ascorbic acid (18.31 mg;  $10.4 \times 10^{-5}$  mol), sodium acetate (0.34 mg;  $10.4 \times 10^{-5}$  mmol)

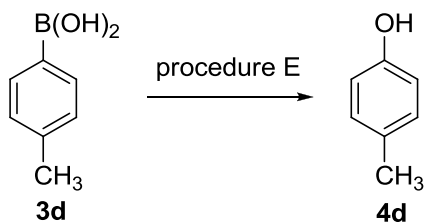

<sup>1</sup>H NMR spectra, CD<sub>3</sub>CN – full screen

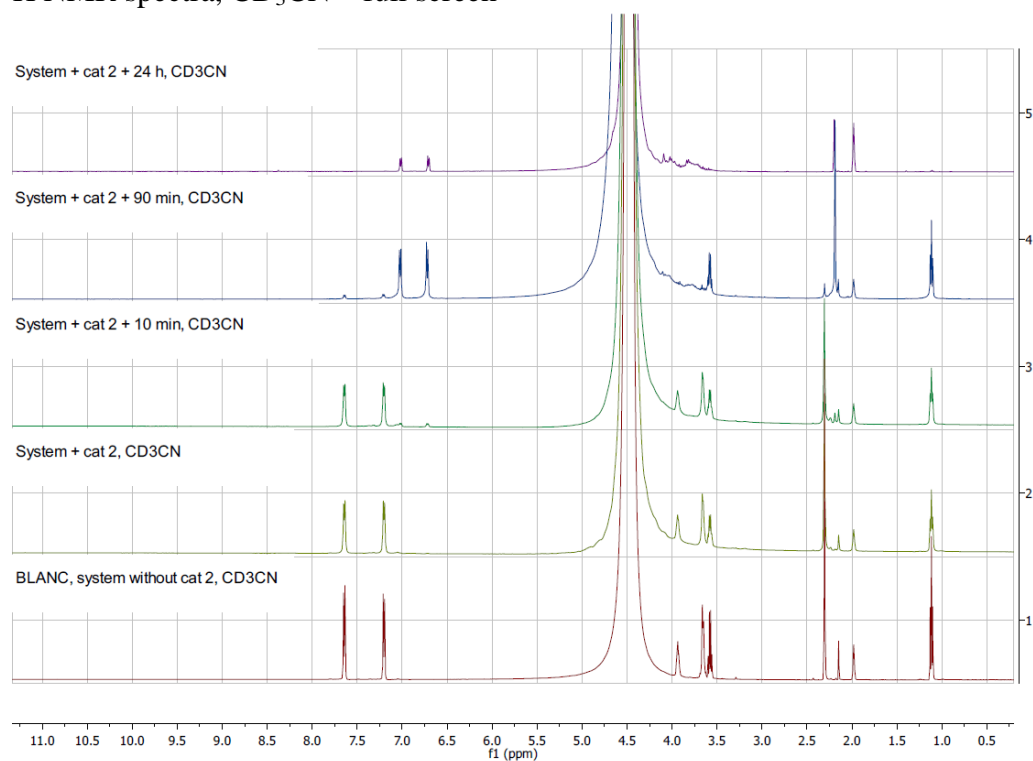

<sup>11</sup>B NMR spectra, CD<sub>3</sub>CN – full screen (unexpected peak at 10 ppm corresponds to complex between boric acid and dehydroascorbic acid, see explanation below)

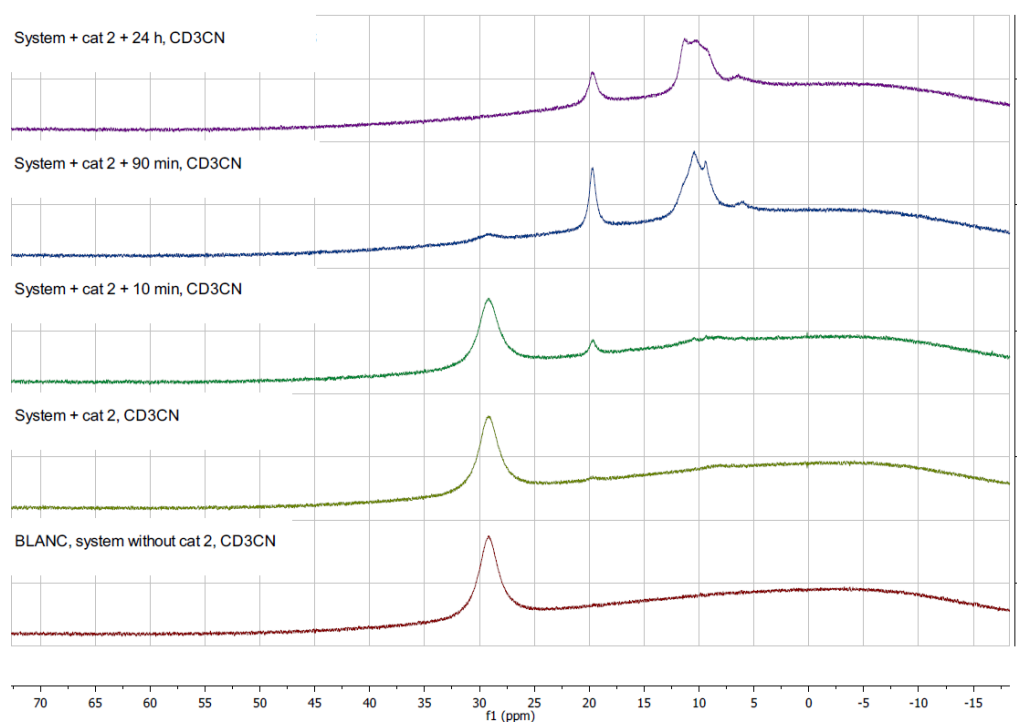



### Explanation of unexpected peaks in $^{11}\text{B}$ NMR spectra –generation of dehydroascorbic acid from ascorbic acid and its interaction with boric acid

Ascorbic acid (14.09 mg;  $7.9 \times 10^{-5}$  mol) and sodium acetate (0.34 mg;  $10.4 \times 10^{-5}$  mol) were dissolved in the mixture of trifluoroethanol (350  $\mu\text{L}$ ),  $\text{D}_2\text{O}$  (150  $\mu\text{L}$ ) and  $\text{CD}_3\text{OD}$  (100  $\mu\text{L}$ ) in NMR cell. After blank measurement boric acid (4.88 mg;  $7.9 \times 10^{-5}$  mol) and hydrogen peroxide (2.42 mL 30% water solution;  $7.9 \times 10^{-5}$  mol) were added. After 10 min  $^{11}\text{B}$  NMR spectra were measured. Control measurement was performed with commercial dehydroascorbic acid (13.75 mg;  $7.9 \times 10^{-5}$  mol), boric acid (4.88 mg;  $7.9 \times 10^{-5}$  mol) and sodium acetate (0.34 mg;  $10.4 \times 10^{-5}$  mol) in trifluoroethanol (350  $\mu\text{L}$ ),  $\text{D}_2\text{O}$  (150  $\mu\text{L}$ ) and  $\text{CD}_3\text{OD}$  (100  $\mu\text{L}$ ).

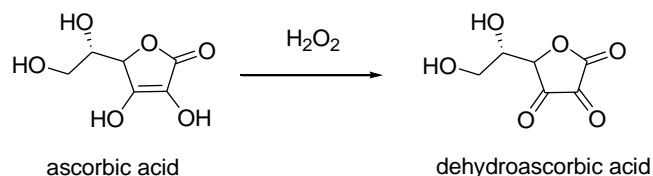

$^{11}\text{B}$  NMR spectra,  $\text{CD}_3\text{OD}$  – interaction of boric acid and dehydroascorbate

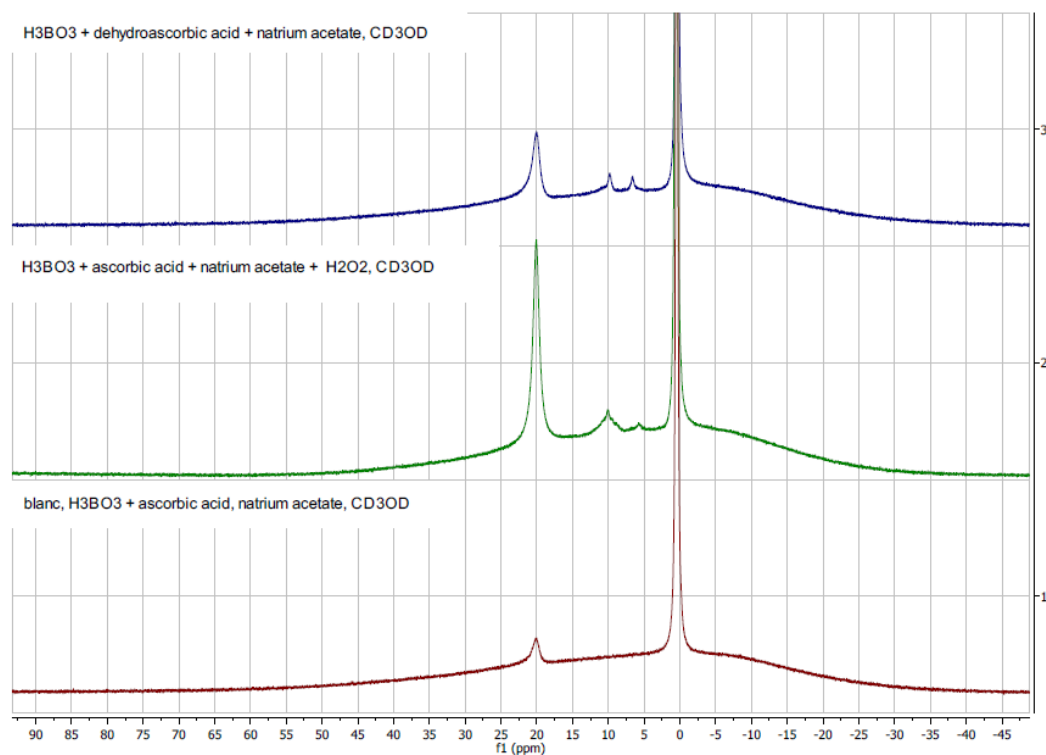

Supplement: c3ob42081g1.pdf [file c3ob42081g1.pdf]
